1 PLOS One

2

3

4

5 ADC mapping with 12 *b* values: an improved technique for image  
6 quality in diffusion prostate MRI

7

8

9

10

11 Lucas Scatigno Saad,<sup>1</sup> George de Queiroz Rosas,<sup>2</sup> Homero José de Farias e Melo,<sup>3</sup>

12 Henrique Armando Azevedo Gabriele,<sup>4</sup> Jacob Szejnfeld<sup>5</sup>

13

14 <sup>1</sup> Universidade Federal de São Paulo (UNIFESP), São Paulo, SP, Brazil.

15 <sup>2</sup> Universidade Federal de São Paulo (UNIFESP), São Paulo, SP, Brazil.

16 <sup>3</sup> Universidade Federal de São Paulo (UNIFESP), São Paulo, SP, Brazil.

17 <sup>4</sup> Universidade Federal de São Paulo (UNIFESP), São Paulo, SP, Brazil.

18 <sup>5</sup> Universidade Federal de São Paulo (UNIFESP), São Paulo, SP, Brazil.

19

20 *Corresponding author*

21 Lucas Scatigno Saad

22 [lucsaad@gmail.com](mailto:lucsaad@gmail.com) (LSS)

23

24

25

26 All authors contributed equally to this work.

27 Conflict of Interest: The authors have no conflicts of interest to disclose.

28

29

30

31

32

33

34

35

## 36 Abstract

37 Purpose: To compare diffusion images and coefficients obtained with 4 *b*-value versus  
38 12 *b*-value apparent diffusion coefficient (ADC) mapping for characterization of prostate  
39 lesions and how these coefficients relate and compare to the PI-RADS™ classification  
40 and Gleason grading system.

41 Methods: Patients with indications for prostate cancer testing (n=158) underwent  
42 multiparametric 3T magnetic resonance imaging (MRI). Two diffusion sequences were  
43 acquired, one with 4 *b* values and one with 12 *b* values. ADC maps were calculated for  
44 each (ADC<sub>4</sub> and ADC<sub>12</sub>) and the respective coefficients were tested for correlation with  
45 PI-RADS™ classification and Gleason score.

46 Results: The ADC<sub>12</sub> sequence produced images of superior quality and sharpness than  
47 ADC<sub>4</sub>. Normal-area means (ADC<sub>4</sub>, 1793.3×10<sup>-6</sup> mm<sup>2</sup>/s; ADC<sub>12</sub>, 1100×10<sup>-6</sup> mm<sup>2</sup>/s) were  
48 significantly lower than those of lesion areas (ADC<sub>4</sub>, 1105.9×10<sup>-6</sup> mm<sup>2</sup>/s; ADC<sub>12</sub>,  
49 689.4×10<sup>-6</sup> mm<sup>2</sup>/s) (p<0.001). Both techniques behaved similarly and correlated well with  
50 PI-RADS™ classification, distinguishing scores 3, 4, and 5 and with means tending to  
51 decline with increasing Gleason grade. ADC<sub>12</sub> mapping yielded higher specificity than  
52 ADC<sub>4</sub> (82.6% vs. 72.3%).

53 Conclusions: Diffusion with 12 values is a viable technique for examination of the  
54 prostate. It produced higher-quality images than current techniques and correlates well  
55 with PI-RADS™ classification and Gleason score.

56

57

58

59

60

61

## 62 Introduction

63 Prostate cancer is the third most prevalent cancer in the United States. About  
64 160,000 new cases were diagnosed in 2017, representing approximately 10% of all new  
65 cases of cancer in men [1]. Classically, screening for prostate in the general population  
66 is performed by PSA (prostate specific antigen) testing and rectal examination; however,  
67 both are unsatisfactory for early detection of clinically significant lesions [2, 3].

68 Magnetic resonance imaging (MRI) for prostate evaluation was first proposed in  
69 the mid-1980s [4,5], with the objective of staging already-diagnosed tumors;  
70 technological advances at the time enhanced the potential of MRI to detect suspicious  
71 lesions. Since then, MRI has gained widespread use in clinical practice, whether for  
72 screening or staging of tumors. MRI often avoids more invasive and unnecessary  
73 procedures, such as prostate biopsy, which is performed indiscriminately in most centers  
74 and can lead to a series of complications [6]. New techniques, such as biopsy with  
75 sonographic and resonance-derived fusion images, have become the focus of much  
76 recent literature due to their potential to increase diagnostic value [7, 8].

77 Among the tools used to diagnose prostate cancer by MRI, one stands out:  
78 diffusion-weighted imaging (DWI), a functional imaging sequence that measures signal  
79 arising from movement of water molecules in the tissue of interest. DWI requires at least  
80 two acquisitions with different time lengths and gradient amplitudes, commonly known  
81 as the  $b$  value, which is the measure of the diffusion power of a given sequence. Higher  
82  $b$  values are associated with greater diffusion gradient weighting used in the sequence  
83 and, consequently, greater the diagnostic accuracy to study restriction. The effective limit  
84 is  $2500 \text{ s/mm}^2$  [9], a threshold over which image distortion begins to occur with  
85 substantial loss of lesional spatial resolution.

86 The signal difference between diffusion sequences acquired with different  $b$   
87 values results in a first-degree exponential equation that yields the apparent diffusion  
88 coefficient (ADC). The ADC, which is a quantitative measure of the movement speed

89 and restriction of a given molecule, is expressed in square millimeters per unit time in  
90 seconds. It is a reproducible measure of diffusion that can be obtained at any dedicated  
91 workstation by measuring a delimited region of interest (ROI).

92 With the advent of the second version of PI-RADS™, an imaging classification  
93 that aims to stratify prostate imaging findings according to severity and risk [10, 11] for  
94 tumors of the peripheral zone, DWI has become the key sequence for approximating  
95 severity of a possible focal lesion.

96 In addition, the correlation between diffusion, as expressed as a numerical ADC  
97 value, and the aggressiveness of prostate tumors has also been widely studied in the  
98 literature. Significant diffusion restriction is associated with high histological  
99 aggressiveness, as measured by Gleason scores. Therefore, ADC correlates closely  
100 with prognosis and treatment planning for these patients [12-14].

101 However, ADC values obtained in diffusion sequences with *b* values up to 1000  
102 s/mm<sup>2</sup> show an overlap between normal tissues and neoplastic lesions [15-17]. There is  
103 no consensus in the current literature on what the discriminatory *b* value ought to be for  
104 standard study of the prostate [18, 19]. Recent studies show that high *b* values (up to  
105 2000 s/mm<sup>2</sup>) are more sensitive for lesion identification. However, technique limitations  
106 affect the quality and sharpness of images obtained on ADC due to distortion [20-22].

107 This limitation inherent to DWI motivated the search for technical improvements  
108 to optimize image quality and resolution. One such improvement is the possibility of  
109 increasing acquired *b* values. In our experience, diffusion sequences performed with 12  
110 *b* values provide much higher image quality than standard diffusion sequences, which  
111 are usually performed with 4 *b* values.

112 However, in order to include this sequence in routine prostate MRI examination,  
113 it must first be validated, especially with regard to technical parameters, quality, and  
114 diagnostic value of the obtained image.

115 Diffusion sequences are a key part of multiparameter (mp)-MRI study, and meet  
116 the appropriate criteria for diagnosis of prostate cancer. However, obtained images have

117 technical and morphological limitations that often hinder proper identification and exact  
118 localization of lesions. Thus, seeking to improve the quality of anatomical visualization  
119 in diffusion sequences without sacrificing diagnostic capacity, a protocol using 12 *b*  
120 values were developed and compared it to the standard diffusion technique. The main  
121 objectives of this study are to evaluate the sharpness and conspicuity of images obtained  
122 in diffusion sequences with 4 and 12 *b* values for evaluation of the normal prostate and  
123 in the characterization of prostatic lesions; and to establish whether ADC measurements  
124 in both techniques correlate with prostate tumor aggressiveness.

125

126

127

128

129

130

131

132

133

134

135

136

137

138

139

140

141

142

143

## 144 **Materials and methods**

### 145 **Sample**

146           Multiparametric MRI of the prostate was performed in 158 patients with a  
147 clinical/laboratory indication for prostate cancer screening. Patients with increased PSA  
148 and/or altered rectal examination deemed clinically significant were included. Patients  
149 with known cancer who had a clinical indication for MRI staging were also included.  
150 Examinations were carried out between September 2015 and August 2016.

151

### 152 **Technical Parameters**

153           Scans were performed on 3T equipment with a 45 mT/m gradient (Magnetom  
154 Verio and Magnetom Skyra; Siemens Medical Systems, Erlangen, Germany) using a  
155 standard torso coil.

156           The MRI sequences are summarized in Table 1. Axial spin-echo T2, coronal and  
157 sagittal T2 for morphological study of the prostate (256 x 230 matrix, 3.0 mm slice  
158 thickness, 160 x 160 mm FOV, TR = 3560 ms and TE = 114 ms), T1 axial spin-echo  
159 (256 x 230 matrix, 3.0 mm slice thickness, 160 x 160 mm FOV, RT = 550 ms and TE =  
160 9.5 ms).

161           Two single-shot echo-planar axial sequences with diffusion-weighted gradients  
162 for functional study of the prostate were employed: “diffusion 4” (128 x 128 matrix, 3.0  
163 mm slice thickness, 240 x 240 mm FOV, TR = 5500 ms and TE = 75 ms with four values  
164 of  $b = 0; 100; 400; 1000$  s/mm) and “diffusion 12” (128 x 128 matrix, 3.0 mm slice  
165 thickness, 240 x 240 mm FOV, TR = 5900 ms and TE = 72 ms with 12 values of  $b = 0,$   
166 50, 100, 150, 300, 600, 900, 1200, 1500, 1800, 2100, 2400 s/mm). Using acceleration  
167 tools, the diffusion 12 sequence lasted approximately 10 seconds longer than the  
168 diffusion 4 sequence (5 min 21 s versus 5 min 11 s) was obtained. In addition, when  
169 there was no absolute contraindication, the standard protocol included pre and post-

170 contrast dynamic sequences.

171 Post-processing was then performed to calculate ADC maps with 4 values of  $b$

172 ( $ADC_4$ ) and with 12 values of  $b$  ( $ADC_{12}$ ).

173

174 **Table 1. MRI sequences used in the study protocol.**

| Sequence                      | Slice          |          |         |         | Matrix    | Time (min) | b (s/mm <sup>2</sup> )                                       |
|-------------------------------|----------------|----------|---------|---------|-----------|------------|--------------------------------------------------------------|
|                               | thickness (mm) | FOV (mm) | TR (ms) | TE (ms) |           |            |                                                              |
| Sagittal T2                   | 3              | 160      | 3.790   | 114     | 256 x 204 | 02:10      |                                                              |
| Axial T2                      | 3              | 150      | 3.930   | 124     | 256 x 230 | 03:18      |                                                              |
| Coronal T2                    | 3              | 160      | 3.560   | 114     | 256 x 230 | 02:17      |                                                              |
| Axial T1                      | 3              | 150      | 550     | 9.5     | 256 x 230 | 03:54      |                                                              |
| Axial T2 FS                   | 3              | 150      | 5.200   | 134     | 256 x 204 | 04:01      |                                                              |
| Diffusion ( $ADC_4$ )         | 3              | 240      | 5.500   | 75      | 128 x 128 | 05:11      | 0; 100; 400; 1000                                            |
| Diffusion ( $ADC_{12}$ )      | 3              | 250      | 5.900   | 72      | 128 x 128 | 05:21      | 0; 50; 100; 150; 300; 600; 900; 1200; 1500; 1800; 2100; 2400 |
| T2_haste_AXIAL Pelvis         | 5              | 320      | 1.500   | 96      | 320 x 260 | 00:48      |                                                              |
| Axial In Out Phase            | 2.8            | 377      | 3.51    | 1.1     | 256 x 256 | 00:20      |                                                              |
| T1_vibe_fs_cor_p2_bh_384      | 1.5            | 350      | 3.92    | 1.62    | 512 x 332 | 00:27      |                                                              |
| T1 VIBE fs ax bh P2 spair     | 1.7            | 330      | 3.17    | 1.59    | 320 x 224 | 00:25      |                                                              |
| Perfusion_10_FASES Axial      | 1.6            | 200      | 3.81    | 1.53    | 288 x 172 | 04:16      |                                                              |
| T1_vibe_fs_cor_p2_bh_384 -PgD | 1.5            | 350      | 3.92    | 1.62    | 512 x 332 | 00:27      |                                                              |

175 ADC, apparent diffusion coefficient; FOV, field of view; MRI, magnetic resonance

176 imaging; TE, echo time; TR, repetition time.

177

## 178 **Imaging**

179 Images from morphology and functional sequences were evaluated

180 synchronously and simultaneously on a dedicated workstation (syngo.via, Siemens™)

181 and analyzed in consensus between two radiologists with experience in prostate

182 imaging. The following findings were considered as imaging criteria for a clinically

183 significant prostatic lesion (suspicion for cancer): focal hypointensity in T2 and/or signal

184 restriction in  $ADC_4$  and/or  $ADC_{12}$ .

185           Measurements of  $ADC_4$  and  $ADC_{12}$  values were performed using the ROI tool in  
186 areas identified as suspicious, allowing for the largest possible lesion area and copying  
187 the same area to the  $ADC_4$  and  $ADC_{12}$  (Fig 1) through a specific tool that duplicated the  
188 ROI measurement for the sequence of interest. In the absence of a lesion,  
189 measurements were performed only on areas of normal prostate.

190

191 **Fig. 1 Representative magnetic resonance imaging in patient with a prostate mass.**

192 **A)** T2 sequence images showing morphological appearance of mass in left peripheral  
193 zone. **B)**  $ADC_4$  sequence; lesion exhibits restricted diffusion. Yellow circle represents  
194 ROI. **C)**  $ADC_{12}$  sequence; lesion exhibits restricted diffusion. Yellow circle represents  
195 ROI. ADC, apparent diffusion coefficient; ROI, region of interest.

196

197           To assess image quality, the two observers independently analyzed the  
198 sequences side by side on the workstation, grading the sharpness and conspicuity of  
199 two parameters – prostate anatomy and lesion visualization (when present) – on a scale  
200 of 1 (very low sharpness) to 5 (excellent sharpness).

201

## 202 **Statistical Analysis**

203           The means, medians, and standard deviations of the ROI measurements of  $ADC_4$   
204 and  $ADC_{12}$  were calculated for lesion areas and normal areas. Student's *t*-test was used  
205 for comparison of signal behavior between normal and lesion areas. A regression model  
206 was used to compare measurements obtained in  $ADC_4$  and  $ADC_{12}$ , as well as to test for  
207 correlation between average PI-RADS™ and Gleason classification when the patient  
208 underwent biopsy. Receiver operating characteristic (ROC) curves were used to  
209 calculate the sensitivity and specificity of the parameters of interest for prediction of  
210 cancer.



211 Likewise, the scores assigned to image quality were tabulated, analyzed, and  
212 compared between the two sequences also between the two observers.

213

## 214 Results

215 According to the inclusion criteria, 51 patients presented with suspicious lesions  
216 that were measurable by the methodology used in the study design. Normal areas were  
217 measured both in patients with lesions and in patients without lesions, for a total of 158.

218 Means, medians, standard deviations and ranges are summarized in Table 2.  
219 Analysis of means and medians revealed higher values in the normal areas and smaller  
220 values in the lesion areas. In addition, absolute values for the ADC<sub>12</sub> sequence were  
221 overall smaller compared to the ADC<sub>4</sub> values, as observed in the minimum and maximum  
222 values for each measurement.

223

224 **Table 2. ADC<sub>4</sub> and ADC<sub>12</sub> values\***

| Parameters         | Normal ADC <sub>4</sub> | Lesion ADC <sub>4</sub> | Normal ADC <sub>12</sub> | Lesion ADC <sub>12</sub> |
|--------------------|-------------------------|-------------------------|--------------------------|--------------------------|
| Mean               | 1793.3                  | 1105.9                  | 1100.0                   | 689.4                    |
| 95% FI for mean    |                         |                         |                          |                          |
| Lower limit        | 1748.2                  | 1022.0                  | 1071.9                   | 642.6                    |
| Upper limit        | 1838.3                  | 1189.8                  | 1128.1                   | 736.1                    |
| Median             | 1829.5                  | 1162.0                  | 1092.5                   | 680.0                    |
| Standard deviation | 286.4                   | 298.3                   | 178.7                    | 166.1                    |
| Minimum            | 1057.0                  | 478.0                   | 665.0                    | 260.0                    |
| Maximum            | 2631.0                  | 1695.0                  | 1461.0                   | 947.0                    |

225 \* Values expressed as 10<sup>-6</sup> mm<sup>2</sup>/s.

226 ADC, apparent diffusion coefficient; FI, fiducial interval.

227

228

229 Comparison between mean  $ADC_4$  values in normal versus lesion areas revealed  
230 significantly higher coefficients in the former (Student's  $t$  test for paired samples,  
231  $p < 0.001$ ) (Fig 2). A similar relationship was also observed for values obtained from  
232  $ADC_{12}$ , with significantly higher means in normal versus lesion areas, thereby  
233 demonstrating similar behavior in the two techniques (Fig 3).

234

235

236 **Fig. 2. Box-plot of Normal  $ADC_4$  and Lesion  $ADC_4$ .** ADC, apparent diffusion  
237 coefficient.

238 **Fig. 3. Box-plot of Normal  $ADC_{12}$  and Lesion  $ADC_{12}$ .** ADC, apparent diffusion  
239 coefficient.

240

241 Given this similarity in behavior between the two techniques, measurements were  
242 analyzed through a regression model between normal areas and lesion areas (Fig 4),  
243 which demonstrated a constant correlation in lesion measurements of the standard  $ADC_4$   
244 and  $ADC_{12}$ . The following mathematical regression formula was obtained:

245

$$\text{Lesion } ADC_4 = 1.528 * \text{Lesion } ADC_{12}$$

246

247 A similar correlation was also observed in the measurement of normal areas with  
248 standard  $ADC_4$  and  $ADC_{12}$  (Fig 5). By applying the same regression model, we obtained  
249 the following correlation formula:

250

$$\text{Normal Area } ADC_4 = 453.5 + 1.218 * \text{Normal Area } ADC_{12}$$

251

252

253 **Fig. 4. Scatterplot of Lesion  $ADC_4$  and Lesion  $ADC_{12}$ .** ADC, apparent diffusion  
254 coefficient

255 **Fig. 5. Scatterplot of Normal  $ADC_4$  and Normal  $ADC_{12}$ .** ADC, apparent diffusion  
256 coefficient

257 On PI-RADS™ v2 assessment, 6 patients were classified as category 1 (absence  
258 of clinically significant lesion), 99 as category 2 (low probability of clinically significant  
259 cancer), 11 as category 3 (presence of clinically significant cancer is equivocal), 36 as  
260 category 4 (high probability of clinically significant cancer), and 6 as category 5 (very  
261 high probability of clinically significant cancer).

262 Within the group of patients with a suspicious lesion (PI-RADS categories 3, 4,  
263 and 5), analysis of variance (ANOVA) was used to test for correlation of ADC<sub>4</sub>  
264 measurements between the three categories. Statistically significant differences were  
265 observed between groups 3 and 4 and between groups 4 and 5 (p = 0.001), showing a  
266 direct correlation between ADC and tumor aggressiveness as classified by PI-RADS™.  
267 In ADC<sub>12</sub> measurements, similar correlations were observed between groups 3 and 4  
268 and between groups 3 and 5.

269 Of the 158 patients included, 52 underwent prostate biopsy with the following  
270 results: 28 (53.8%) with confirmed cancer, 14 (27.0%) negative for cancer, 7 (13.4%)  
271 diagnosed with prostatitis, 2 (3.8%) with atypical small acinar proliferation (ASAP), and  
272 1 (2.0%) with PIN (prostatic intraepithelial neoplasia).

273 The correlation between Gleason score and ADC<sub>4</sub> and ADC<sub>12</sub> values was  
274 calculated and presented in Table 3. Gleason scores were pooled to facilitate analysis:  
275 score 7 included both the results 3 + 4 and 4 + 3, while score 9 included both the results  
276 4 + 5 and 5 + 4.

277

278 **Table 3. Correlation between Gleason score and ADC values**

| <b>ADC</b>             | <b>Gleason 6</b> | <b>Gleason 7</b> | <b>Gleason 8</b> | <b>Gleason 9</b> |
|------------------------|------------------|------------------|------------------|------------------|
| Mean ADC <sub>4</sub>  | 1121.6           | 1032.8           | 885.5            | 667.7            |
| Mean ADC <sub>12</sub> | 706.4            | 663.3            | 555.8            | 471.0            |

279 ADC, apparent diffusion coefficient.

280

281

282 Mean ADC values fell as Gleason score increased, confirming a trend for lower  
283 ADC values with increasing pathological aggressiveness. However, in both groups,  
284 ANOVA demonstrated no statistically significant differences between Gleason grades in  
285 areas classified as lesions.

286 On analysis of the predictive value of the diffusion sequences for detecting  
287 cancer in the prostate as confirmed by histopathology (through ROC curves and  
288 subsequent calculation of AUC), both techniques were significantly predictive for cancer;  
289 the ADC<sub>4</sub> sequence had a minimum cut-off value of  $1153 \times 10^{-6} \text{ mm}^2/\text{s}$ , sensitivity of  
290 71.4% and specificity of 72.3%, and the ADC<sub>12</sub> sequence, a minimum cut-off value of  
291  $637.5 \times 10^{-6} \text{ mm}^2/\text{s}$ , sensitivity of 53.6%, and specificity of 82.6% (Figure 6).

292

293 **Fig. 6. ROC curves for ADC<sub>4</sub> (right) and ADC<sub>12</sub> (left).** ADC, apparent diffusion  
294 coefficient.

295

296 The analysis of interobserver agreement related to the classification of image  
297 quality and sharpness were made by the kappa coefficient and Spearman correlations,  
298 that revealed low but significant agreement across all parameters, except for correlation  
299 of the ADC<sub>12</sub> anatomy classification, which did not demonstrate agreement that was  
300 significantly different from zero. In short, the two observers tended to make similar  
301 classifications.

302 On comparative analysis between ADC<sub>4</sub> and ADC<sub>12</sub> in relation to anatomy and  
303 lesion identification, we obtained significantly higher mean classification values for both  
304 observers with ADC<sub>12</sub> than with ADC<sub>4</sub> ( $p < 0.001$ ) (Figure 7), demonstrating that the new  
305 technique provides a higher degree of sharpness than the standard sequence, both to  
306 study the anatomy of the prostate and to identify suspicious lesions (Figure 8).

307

308

309

310 **Fig. 7. Box plot of Anatomic ADC<sub>4</sub> and Anatomic ADC<sub>12</sub>.** ADC, apparent diffusion  
311 coefficient.

312

313 **Fig. 8. Comparison of image quality between the two diffusion techniques.** Panels  
314 A and C show characterization of a focal lesion and prostate anatomy, respectively, with  
315 an ADC<sub>12</sub> sequence; panels B and D show the same lesion and anatomy imaged with  
316 an ADC<sub>4</sub> sequence. ADC, apparent diffusion coefficient.

317

## 318 **Discussion**

319 Diffusion imaging is already established in literature and practice as an important  
320 tool for study of the prostate, able to function even as a biomarker of tumor  
321 aggressiveness [12-17]. The present study demonstrated the viability of a diffusion  
322 sequence with 12 *b* values as compared to the standard diffusion sequence of 4 *b* values  
323 for routine mp-MRI of the prostate.

324 Diffusion sequences with several numbers of *b* values have been reported in the  
325 recent literature [19-22], but there is no established consensus as to the technical  
326 parameters of choice for the study of the prostate. The latest version of PI-RADS™  
327 (2015) does not provide any indication of how many *b* values should be used. Ultra-high  
328 *b* values may add some benefit in identification of lesions, but at the expense of  
329 decreased image quality and sharpness [20, 21]. In addition, other studies on diffusion  
330 sequences of the prostate have described an overlap between benign prostatic focal  
331 lesions that restrict diffusion, such as nodules of benign hyperplasia and focal areas of  
332 prostatitis, and malignant lesions [15-17]. In the literature review, no studies were found  
333 that compared two diffusion sequences with different *b* values in relation to image quality.

334 In this study, the main objective was to improve the technical parameters and  
335 image quality of diffusion sequencing while maintaining its high diagnostic value.

336 As the primary result, the conspicuity and sharpness of images obtained by

337 diffusion with 12 *b* values were significantly greater than those of images obtained with  
338 four *b* values, both for evaluation of normal anatomy and of focal lesions. Thus,  
339 interpretation of these images for characterization of possible suspicious lesions was  
340 significantly improved, overcoming a challenge that is frequently reported in the  
341 literature. This improvement in image quality, with little impact on sequence duration  
342 (about 10 additional seconds), greatly optimizes mp-MRI protocol. As the literature  
343 increasingly tends to favor MRI for initial screening of prostate cancer, consequently  
344 increasing the importance of T2 and DWI sequences [23, 24], this optimization will be of  
345 great value to make MRI more effective in identifying lesions.

346 Both in the standard technique and in the new technique, overall ADC values  
347 were statistically significantly lower in neoplastic tissue compared to normal prostate  
348 tissue. In addition, ADC values in the 12 *b*-value sequence were comparable to those  
349 obtained with four *b* values and were similarly distributed among patients, thus yielding  
350 a constant ratio of ADC values in both techniques. On PI-RADS™ classification  
351 correlation, both techniques were effective in differentiating between classifications of  
352 lower aggressiveness (3) and greater aggressiveness (4 and 5).

353 On analysis of predictive value, both sequences proved to be significant  
354 predictors of cancer, with ADC<sub>12</sub> having a higher specificity than ADC<sub>4</sub>, demonstrating  
355 that it is the technique best able to rule out the possibility of cancer.

356 Although a statistically significant correlation between ADC<sub>4</sub> or ADC<sub>12</sub> values and  
357 Gleason score obtained through biopsy was not found, probably due to the small number  
358 of patients in our sample who underwent histopathological study, average absolute ADC  
359 values decreased as Gleason score increased, demonstrating a trend for mean ADC  
360 values to follow the grade of pathological aggressiveness of the tumor.

361 Major limitations of this study include the technique of histopathological study,  
362 which was performed on specimens obtained by cognitive fusion biopsy. Classically, the  
363 gold-standard method of pathological study is prostatectomy. Thus, Gleason  
364 classifications could have been different in some cases, which might have led to a

365 different percentage of more or less aggressive tumors. Another modality that is currently  
366 being studied and which has shown promising results is prostate biopsy with cognitive  
367 fusion of MRI and ultrasound imaging, which aids in adequate localization of the  
368 suspected lesion and allows identification of additional tissue fragments from the area  
369 that is most abnormal on MRI [7, 8, 25]. Another limitation was the small number of  
370 patients whose biopsy was positive for prostate neoplasm (n=28), among whom only 17  
371 had a Gleason score of 7 or higher, significantly reducing the number of cases of  
372 clinically significant cancer according to the PI-RADS™ criteria. A greater number of  
373 cases with proven cancer would be needed to establish statistically relevant correlations  
374 with Gleason classification.

375

## 376 **Conclusions**

377 To conclude, the ADC sequences with 12 *b* values are fully viable for MRI of the  
378 prostate and produce images of superior quality and sharpness than current techniques,  
379 which usually employ four *b* values. Its constant relationship with the standard diffusion  
380 sequence and good correlation with the PI-RADS™ and Gleason classifications endorse  
381 its use in mp-MRI of the prostate.

382

## 383 **References**

- 384 [1] National Cancer Institute Cancer Stat Facts. Prostate Cancer.  
385 <https://seer.cancer.gov/statfacts/html/prost.html>. Accessed 12 July 2017
- 386 [2] Frankel S, Smith GD, Donovan J, Neal D (2003) Screening for prostate cancer. *Lancet* 361  
387 9363:1122-1128. 10.1016/S0140-6736(03)12890-5
- 388 [3] Pashayan N, Duffy SW, Pharoah P, Greenberg D, Donovan J, Martin RM, Hamdy F, Neal DE  
389 (2009) Mean sojourn time, overdiagnosis, and reduction in advanced stage prostate cancer due  
390 to screening with PSA: implications of sojourn time on screening. *British journal of cancer* 100  
391 7:1198-1204. 10.1038/sj.bjc.6604973
- 392 [4] Steyn JH, Smith FW (1982) Nuclear magnetic resonance imaging of the prostate. *Br J Urol* 54  
393 6:726-728
- 394 [5] Poon PY, McCallum RW, Henkelman MM, Bronskill MJ, Sutcliffe SB, Jewett MA, Rider WD,  
395 Bruce AW (1985) Magnetic resonance imaging of the prostate. *Radiology* 154 1:143-149.  
396 10.1148/radiology.154.1.2578070
- 397 [6] Loeb S, Vellekoop A, Ahmed HU, Catto J, Emberton M, Nam R, Rosario DJ, Scattoni V, Lotan  
398 Y (2013) Systematic review of complications of prostate biopsy. *European urology* 64 6:876-892.  
399 10.1016/j.eururo.2013.05.049
- 400 [7] Puech P, Rouviere O, Renard-Penna R, Villers A, Devos P, Colombel M, Bitker MO, Leroy X,  
401 Mege-Lechevallier F, Comperat E, Ouzzane A, Lemaitre L (2013) Prostate cancer diagnosis:  
402 multiparametric MR-targeted biopsy with cognitive and transrectal US-MR fusion guidance versus  
403 systematic biopsy--prospective multicenter study. *Radiology* 268 2:461-469.  
404 10.1148/radiol.13121501
- 405 [8] Mariotti GC, Costa DN, Pedrosa I, Falsarella PM, Martins T, Roehrborn CG, Rofsky NM, Xi Y,  
406 TC MA, Queiroz MR, Lotan Y, Garcia RG, Lemos GC, Baroni RH (2016) Magnetic  
407 resonance/transrectal ultrasound fusion biopsy of the prostate compared to systematic 12-core  
408 biopsy for the diagnosis and characterization of prostate cancer: multi-institutional retrospective  
409 analysis of 389 patients. *Urol Oncol* 34 9:416 e419-416 e414. 10.1016/j.urolonc.2016.04.008
- 410 [9] Rosenkrantz AB, Parikh N, Kierans AS, Kong MX, Babb JS, Taneja SS, Ream JM (2016)  
411 Prostate Cancer Detection Using Computed Very High b-value Diffusion-weighted Imaging: How  
412 High Should We Go? *Acad Radiol* 23 6:704-711. 10.1016/j.acra.2016.02.003



- 413 [10] Barentsz JO, Richenberg J, Clements R, Choyke P, Verma S, Villeirs G, Rouviere O, Logager  
414 V, Futterer JJ, European Society of Urogenital R (2012) ESUR prostate MR guidelines 2012.  
415 European radiology 22 4:746-757. 10.1007/s00330-011-2377-y
- 416 [11] American College of Radiology Prostate Imaging Reporting and Data System (PI-RADS).  
417 <http://www.acr.org/Quality-Safety/Resources/PIRADS>. Accessed 12 July 2017
- 418 [12] Padhani AR, Liu G, Koh DM, Chenevert TL, Thoeny HC, Takahara T, Dzik-Jurasz A, Ross  
419 BD, Van Cauteren M, Collins D, Hammoud DA, Rustin GJ, Taouli B, Choyke PL (2009) Diffusion-  
420 weighted magnetic resonance imaging as a cancer biomarker: consensus and recommendations.  
421 Neoplasia 11 2:102-125
- 422 [13] Anwar SS, Anwar Khan Z, Shoaib Hamid R, Haroon F, Sayani R, Beg M, Khattak YJ (2014)  
423 Assessment of apparent diffusion coefficient values as predictor of aggressiveness in peripheral  
424 zone prostate cancer: comparison with Gleason score. ISRN radiology 2014:263417.  
425 10.1155/2014/263417
- 426 [14] Hambrock T, Somford DM, Huisman HJ, van Oort IM, Witjes JA, Hulsbergen-van de Kaa CA,  
427 Scheenen T, Barentsz JO (2011) Relationship between apparent diffusion coefficients at 3.0-T  
428 MR imaging and Gleason grade in peripheral zone prostate cancer. Radiology 259 2:453-461.  
429 10.1148/radiol.11091409
- 430 [15] Tamada T, Kanomata N, Sone T, Jo Y, Miyaji Y, Higashi H, Yamamoto A, Ito K (2014) High  
431 b value (2,000 s/mm<sup>2</sup>) diffusion-weighted magnetic resonance imaging in prostate cancer at 3  
432 Tesla: comparison with 1,000 s/mm<sup>2</sup> for tumor conspicuity and discrimination of aggressiveness.  
433 Plos One 9 5:e96619. 10.1371/journal.pone.0096619
- 434 [16] El Kady RM, Choudhary AK, Tappouni R (2011) Accuracy of apparent diffusion coefficient  
435 value measurement on PACS workstation: A comparative analysis. AJR American journal of  
436 roentgenology 196 3:W280-284. 10.2214/AJR.10.4706
- 437 [17] Hoeks CM, Vos EK, Bomers JG, Barentsz JO, Hulsbergen-van de Kaa CA, Scheenen TW  
438 (2013) Diffusion-weighted magnetic resonance imaging in the prostate transition zone:  
439 histopathological validation using magnetic resonance-guided biopsy specimens. Investigative  
440 Radiology 48 10:693-701. 10.1097/RLI.0b013e31828eeaf9
- 441 [18] Metens T, Miranda D, Absil J, Matos C (2012) What is the optimal b value in diffusion-  
442 weighted MR imaging to depict prostate cancer at 3T? European Radiology 22 3:703-709.

- 443 10.1007/s00330-011-2298-9
- 444 [19] Manenti G, Nezzo M, Chegai F, Vasili E, Bonanno E, Simonetti G (2014) DWI of Prostate  
445 Cancer: Optimal b-Value in Clinical Practice. *Prostate cancer* 2014:868269.  
446 10.1155/2014/868269
- 447 [20] Kitajima K, Takahashi S, Ueno Y, Yoshikawa T, Ohno Y, Obara M, Miyake H, Fujisawa M,  
448 Sugimura K (2012) Clinical utility of apparent diffusion coefficient values obtained using high b-  
449 value when diagnosing prostate cancer using 3 tesla MRI: comparison between ultra-high b-value  
450 (2000 s/mm<sup>2</sup>) and standard high b-value (1000 s/mm<sup>2</sup>). *J Magn Reson Imaging* 36 1:198-205.  
451 10.1002/jmri.23627
- 452 [21] Grant KB, Agarwal HK, Shih JH, Bernardo M, Pang Y, Daar D, Merino MJ, Wood BJ, Pinto  
453 PA, Choyke PL, Turkbey B (2015) Comparison of calculated and acquired high b value diffusion-  
454 weighted imaging in prostate cancer. *Abdom Imaging* 40 3:578-586. 10.1007/s00261-014-0246-  
455 2
- 456 [22] Bittencourt LK, Attenberger UI, Lima D, Strecker R, de Oliveira A, Schoenberg SO,  
457 Gasparetto EL, Hausmann D (2014) Feasibility study of computed vs measured high b-value  
458 (1400 s/mm<sup>2</sup>) diffusion-weighted MR images of the prostate. *World J Radiol* 6 6:374-380.  
459 10.4329/wjr.v6.i6.374
- 460 [23] Barth BK, De Visschere P, Cornelius A, Nicolau C, Vargas HA, Eberli D, Donati OF (2017)  
461 Detection of Clinically Significant Prostate Cancer: Short Dual-Pulse Sequence versus Standard  
462 Multiparametric MR Imaging-A Multireader Study. *Radiology* 284 3:725-736.  
463 10.1148/radiol.2017162020
- 464 [24] Kuhl CK, Bruhn R, Kramer N, Nebelung S, Heidenreich A, Schrading S (2017) Abbreviated  
465 Biparametric Prostate MR Imaging in Men with Elevated Prostate-specific Antigen. *Radiology* 285  
466 2:493-505. 10.1148/radiol.2017170129
- 467 [25] Ahmed HU, El-Shater Bosaily A, Brown LC, Gabe R, Kaplan R, Parmar MK, Collaco-Moraes  
468 Y, Ward K, Hindley RG, Freeman A, Kirkham AP, Oldroyd R, Parker C, Emberton M, group Ps  
469 (2017) Diagnostic accuracy of multi-parametric MRI and TRUS biopsy in prostate cancer  
470 (PROMIS): a paired validating confirmatory study. *Lancet* 389 10071:815-822. 10.1016/S0140-  
471 6736(16)32401-1

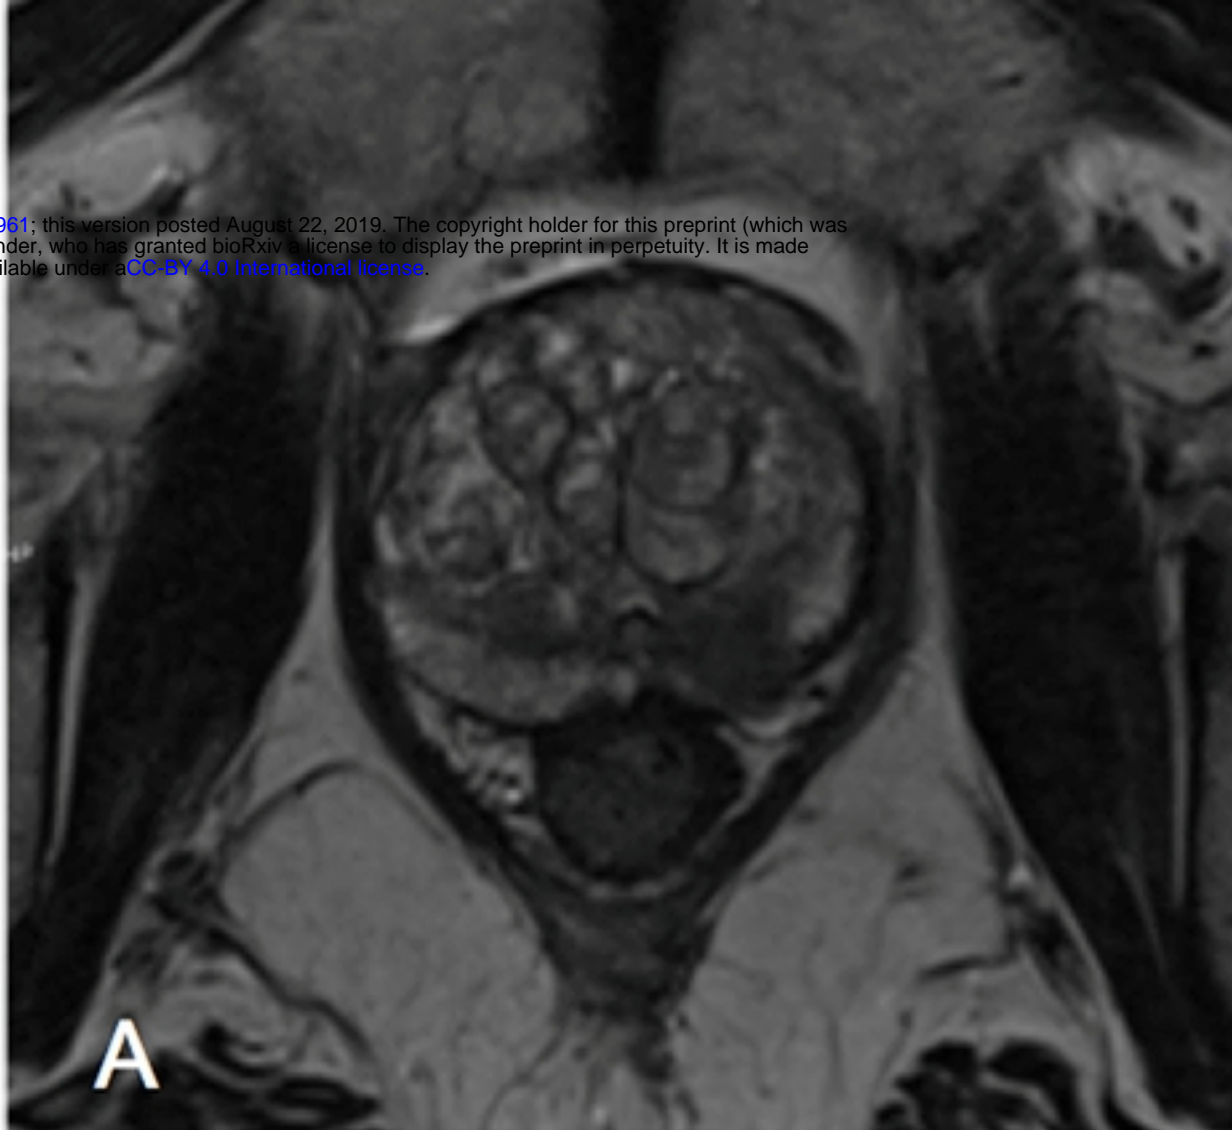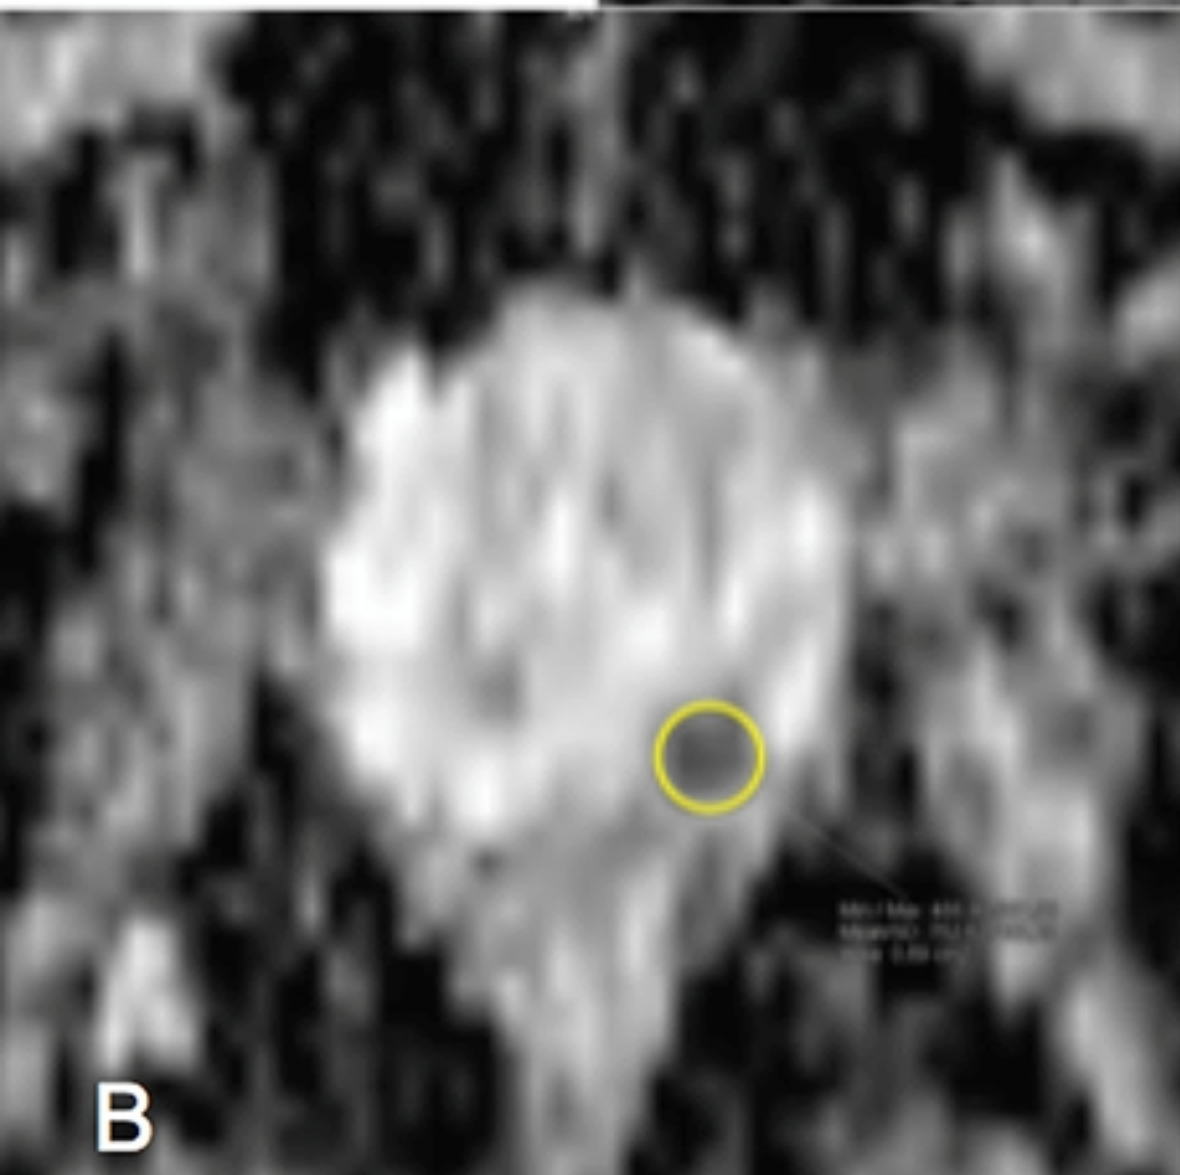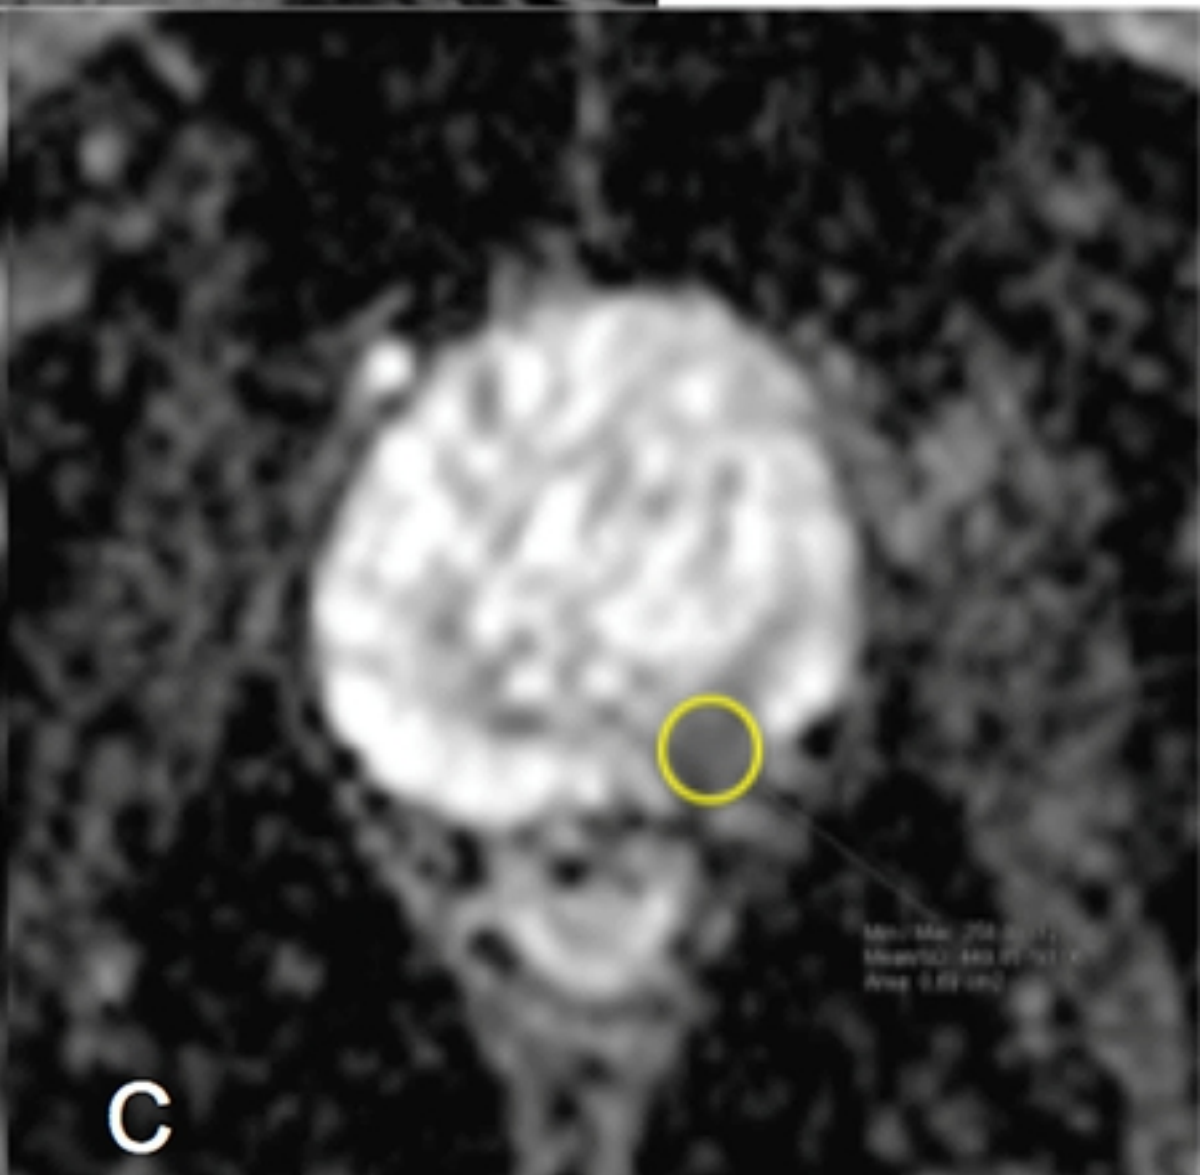

Fig 1

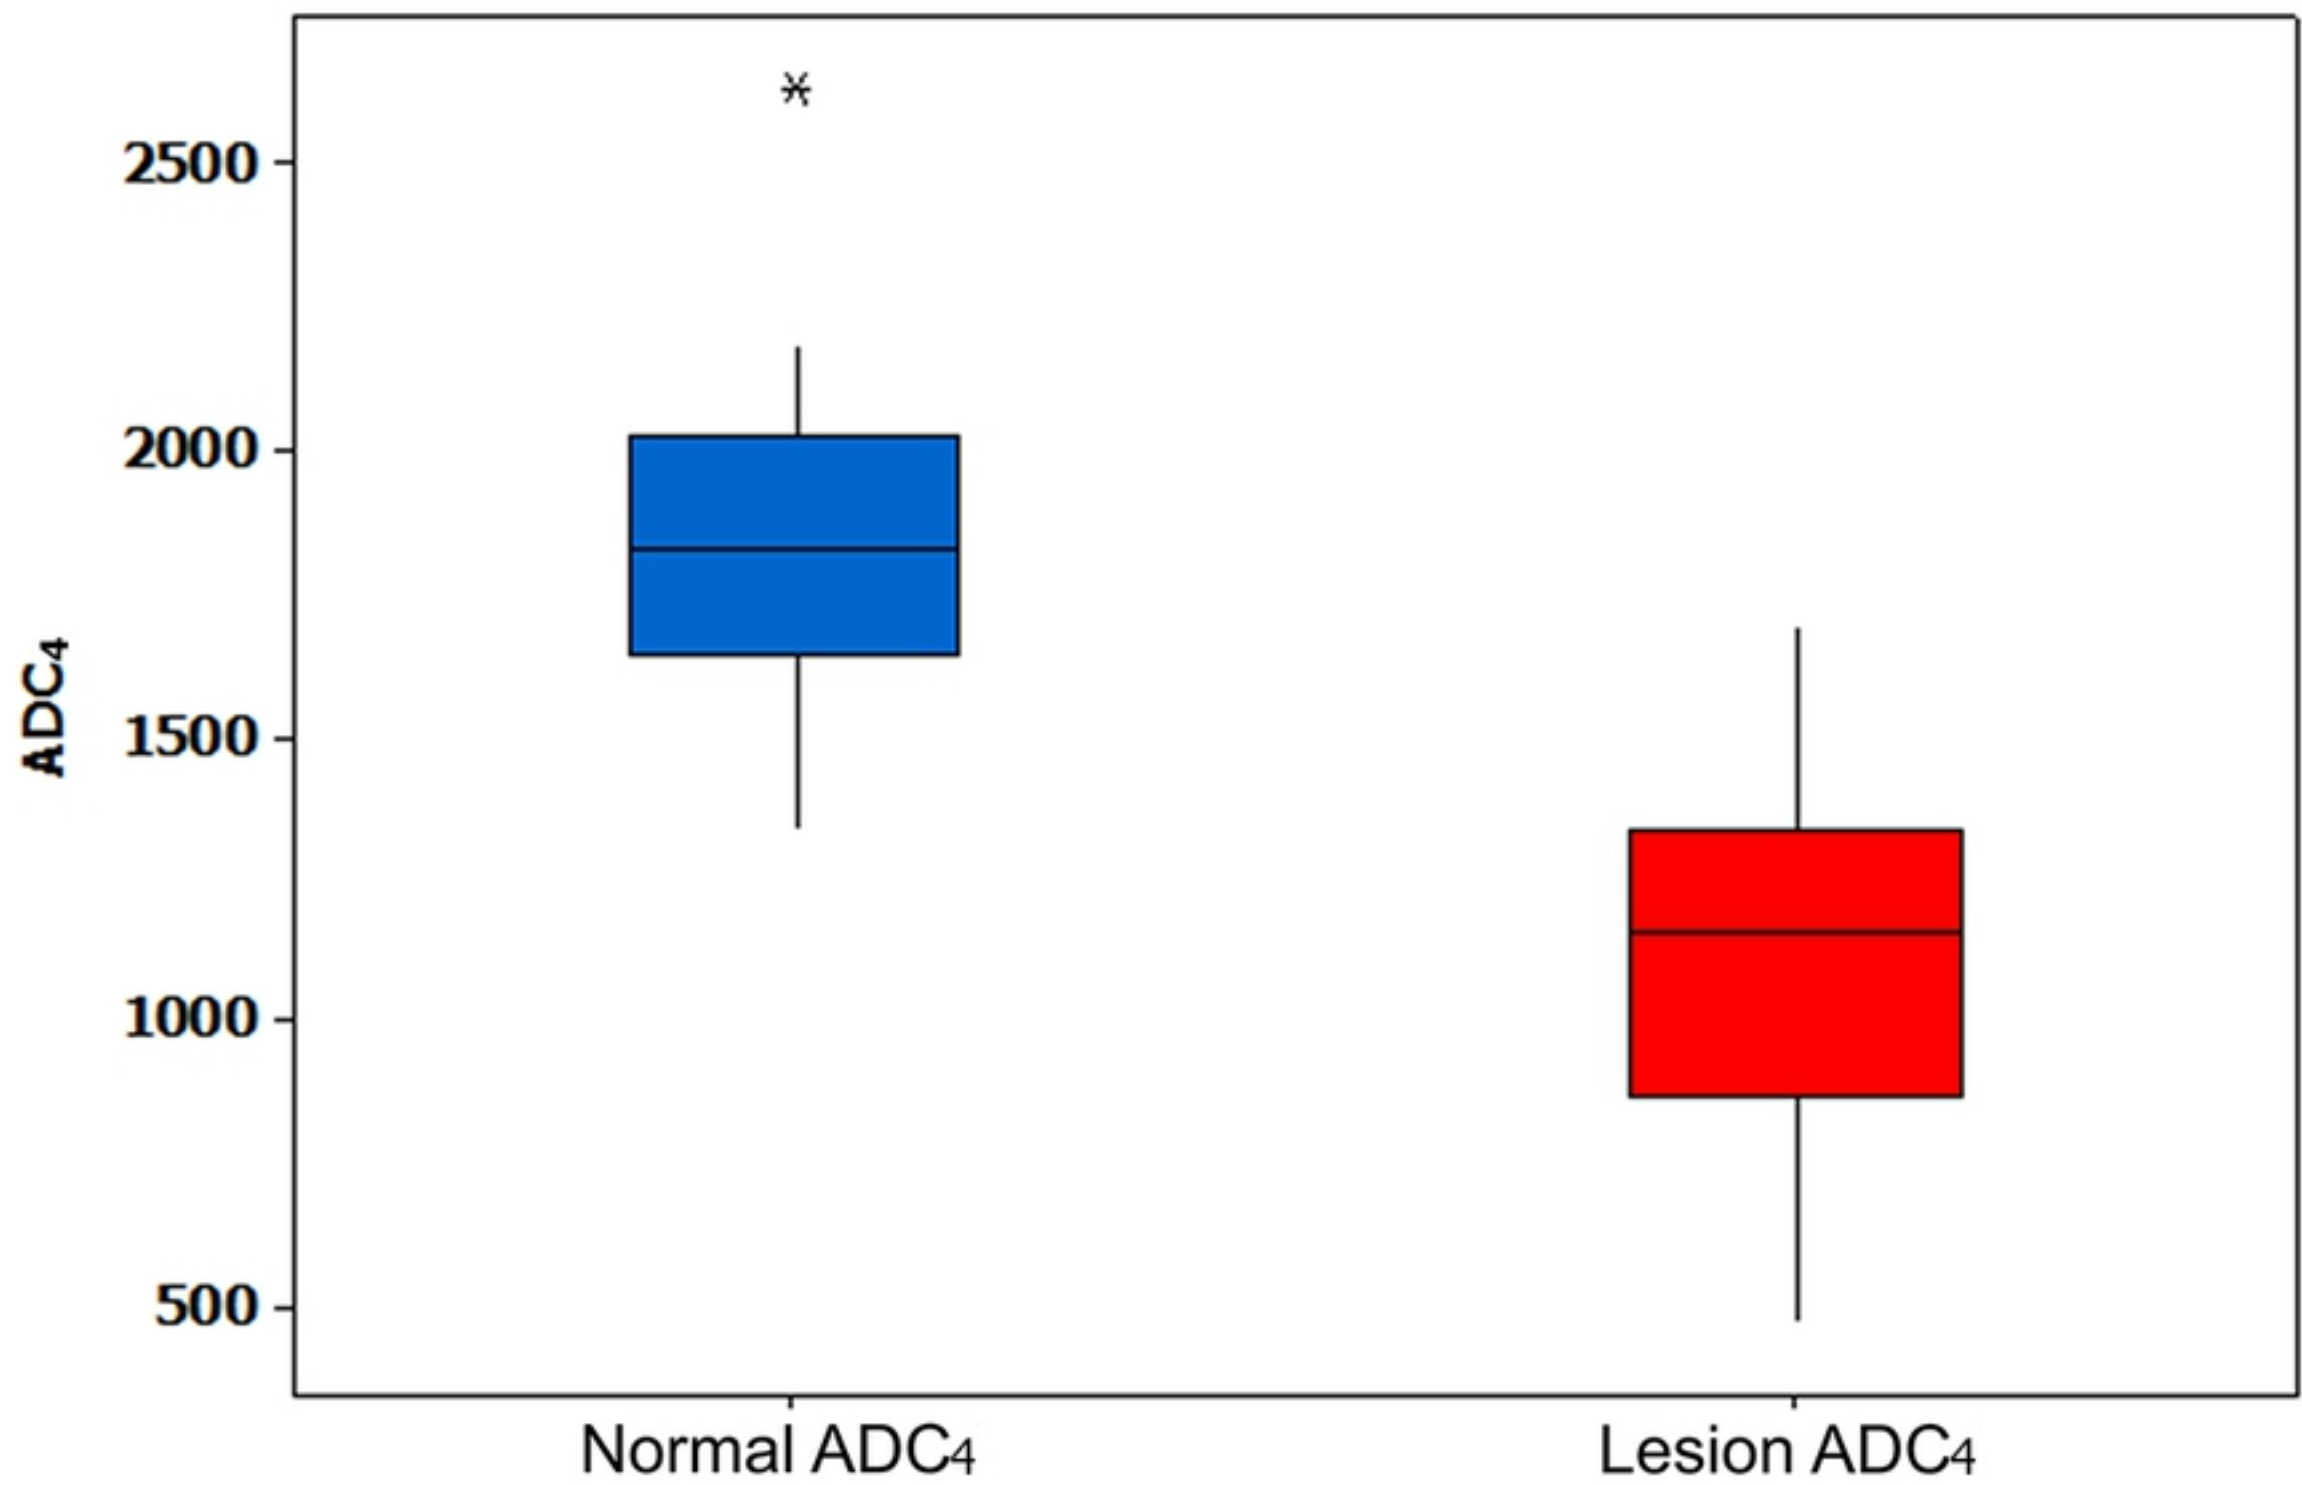

Fig 2

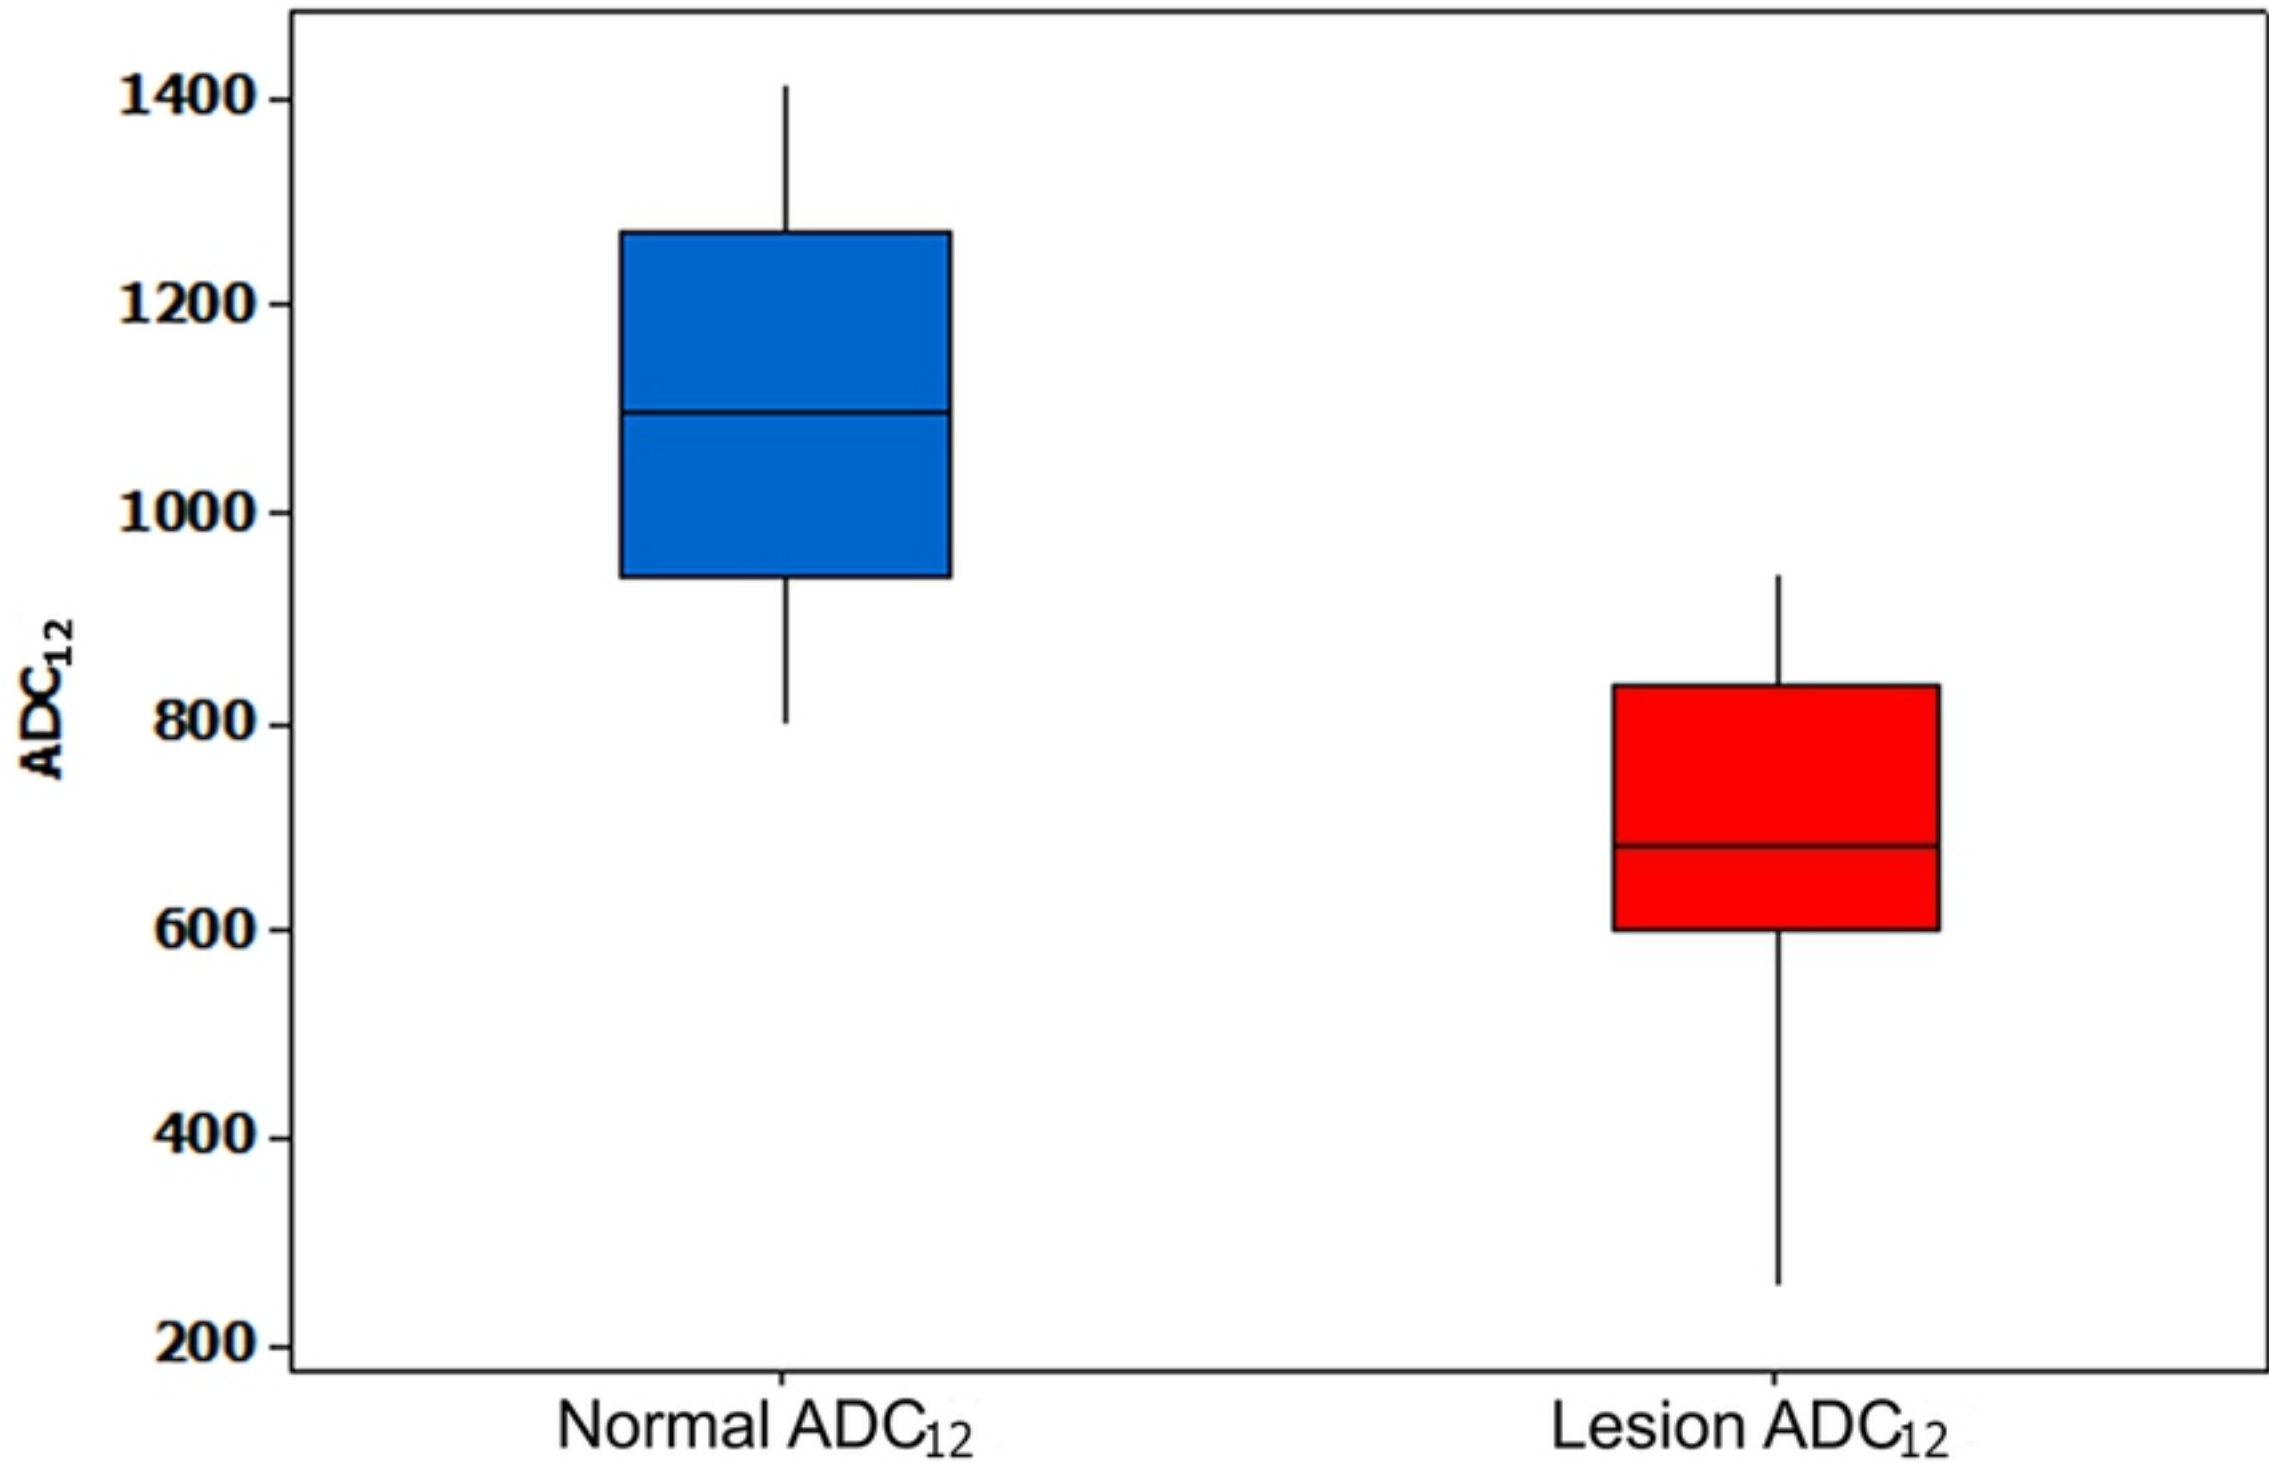

Fig 3

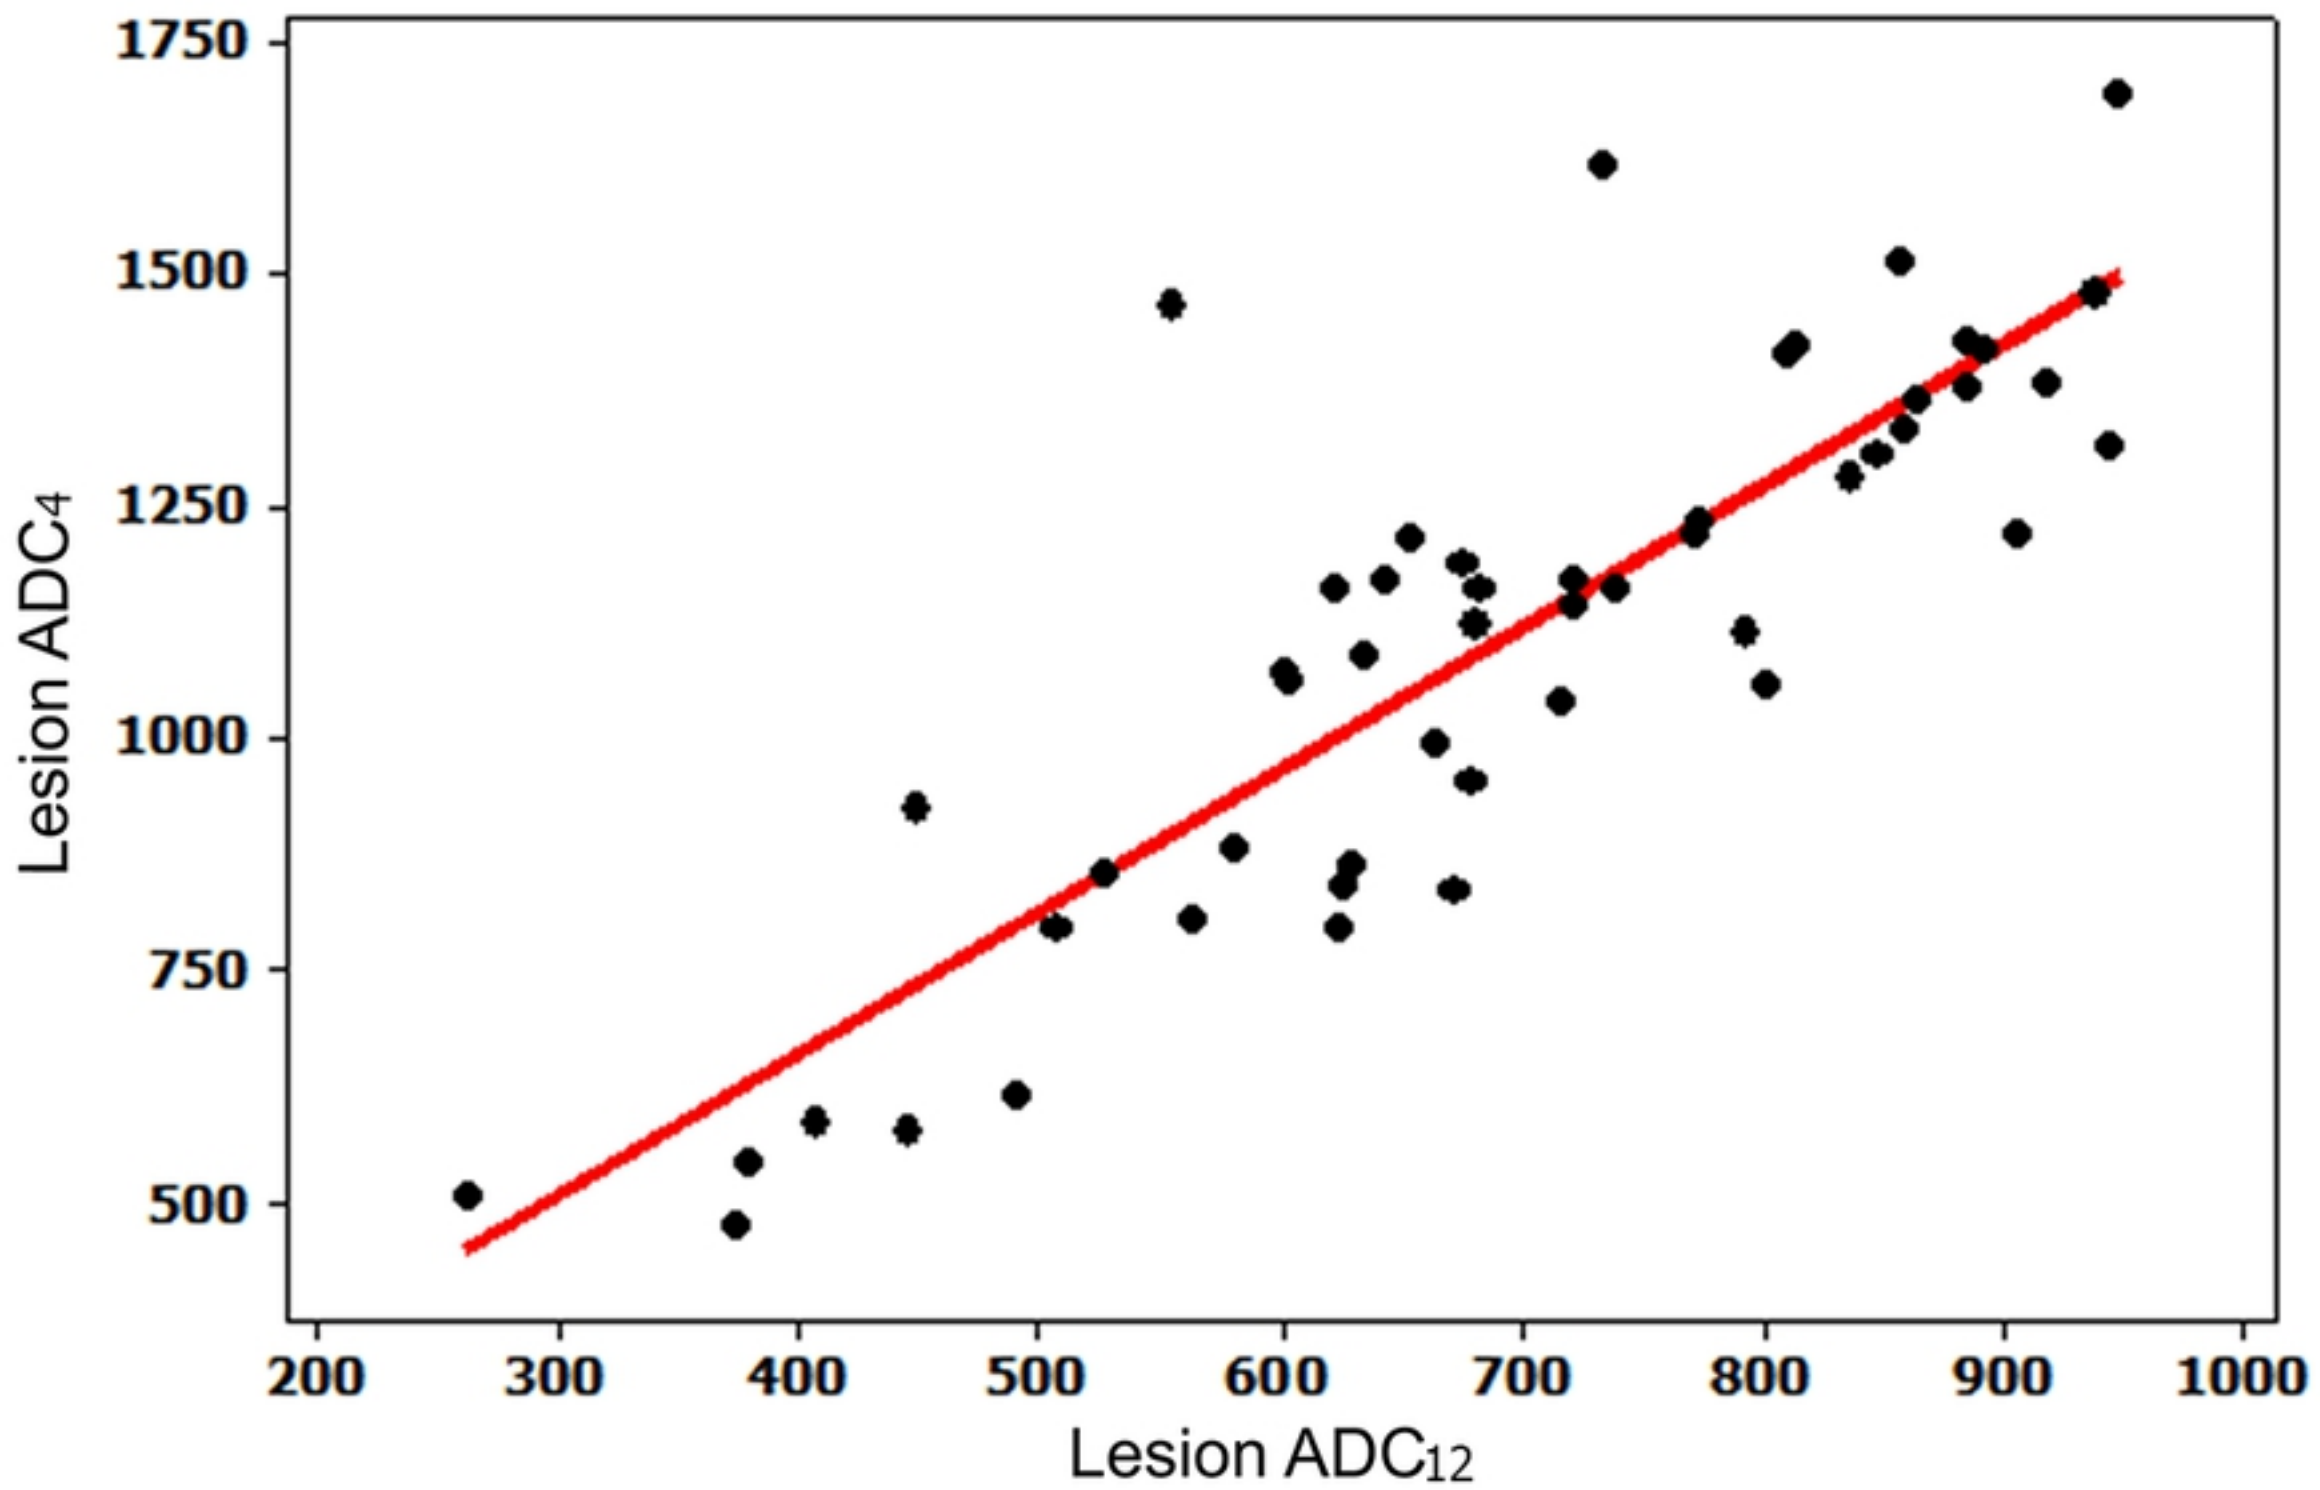

Fig 4



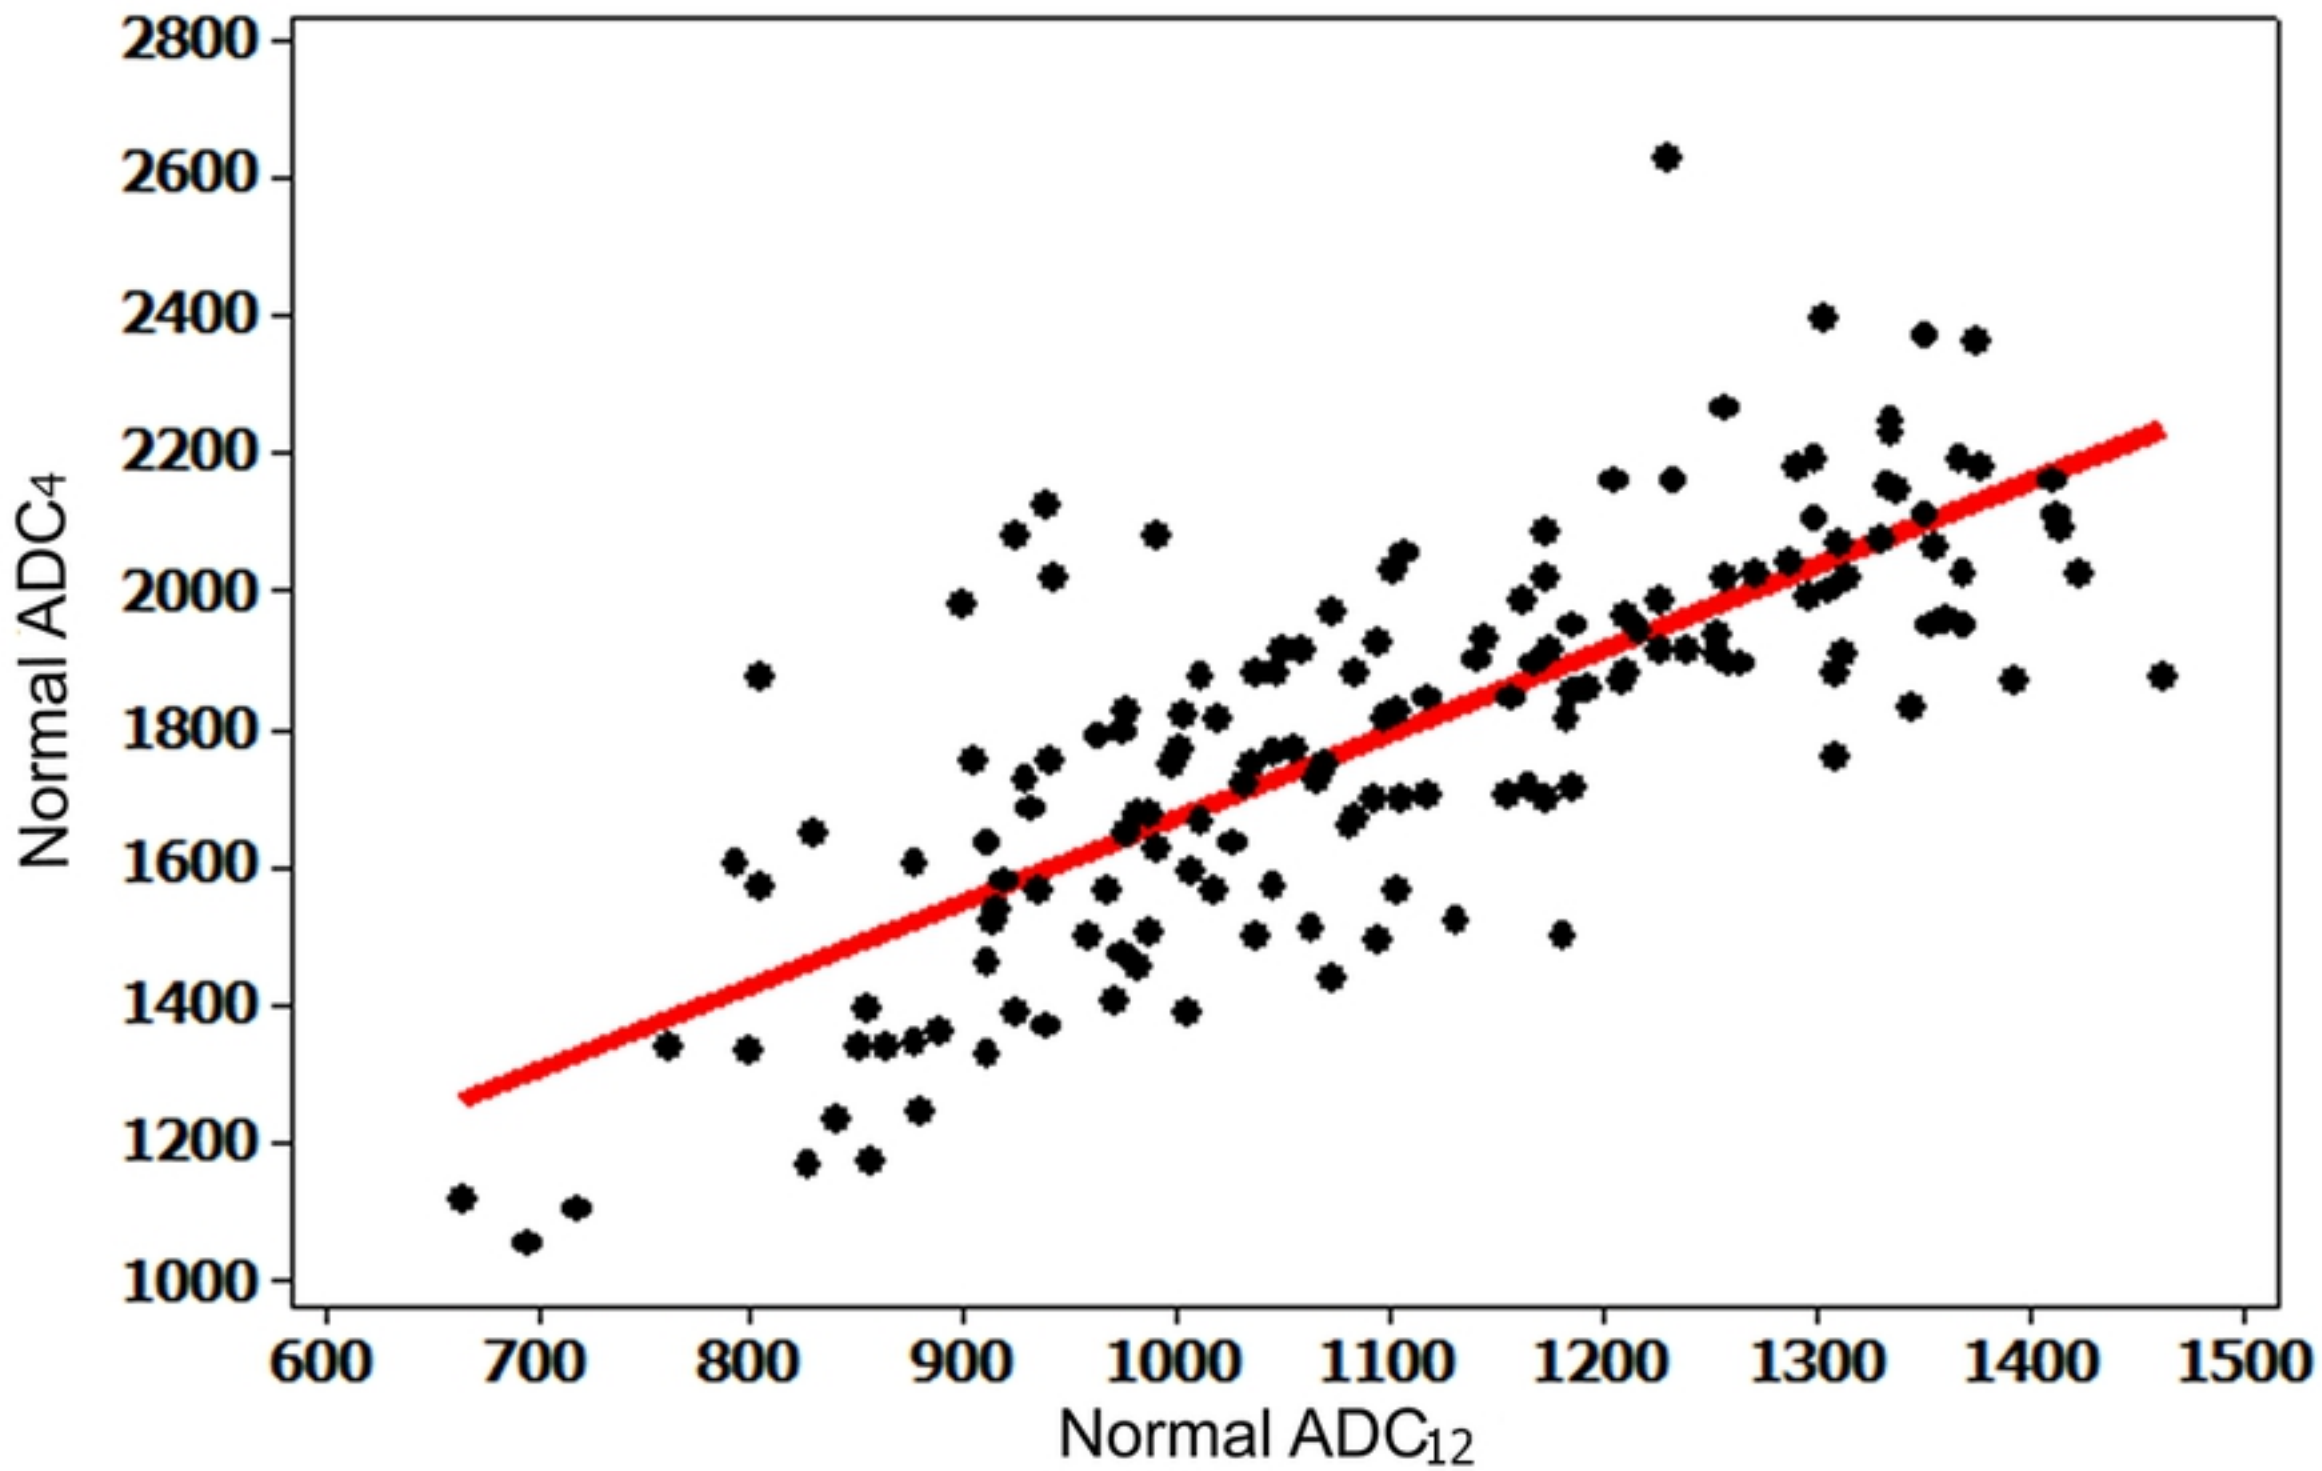

Fig 5

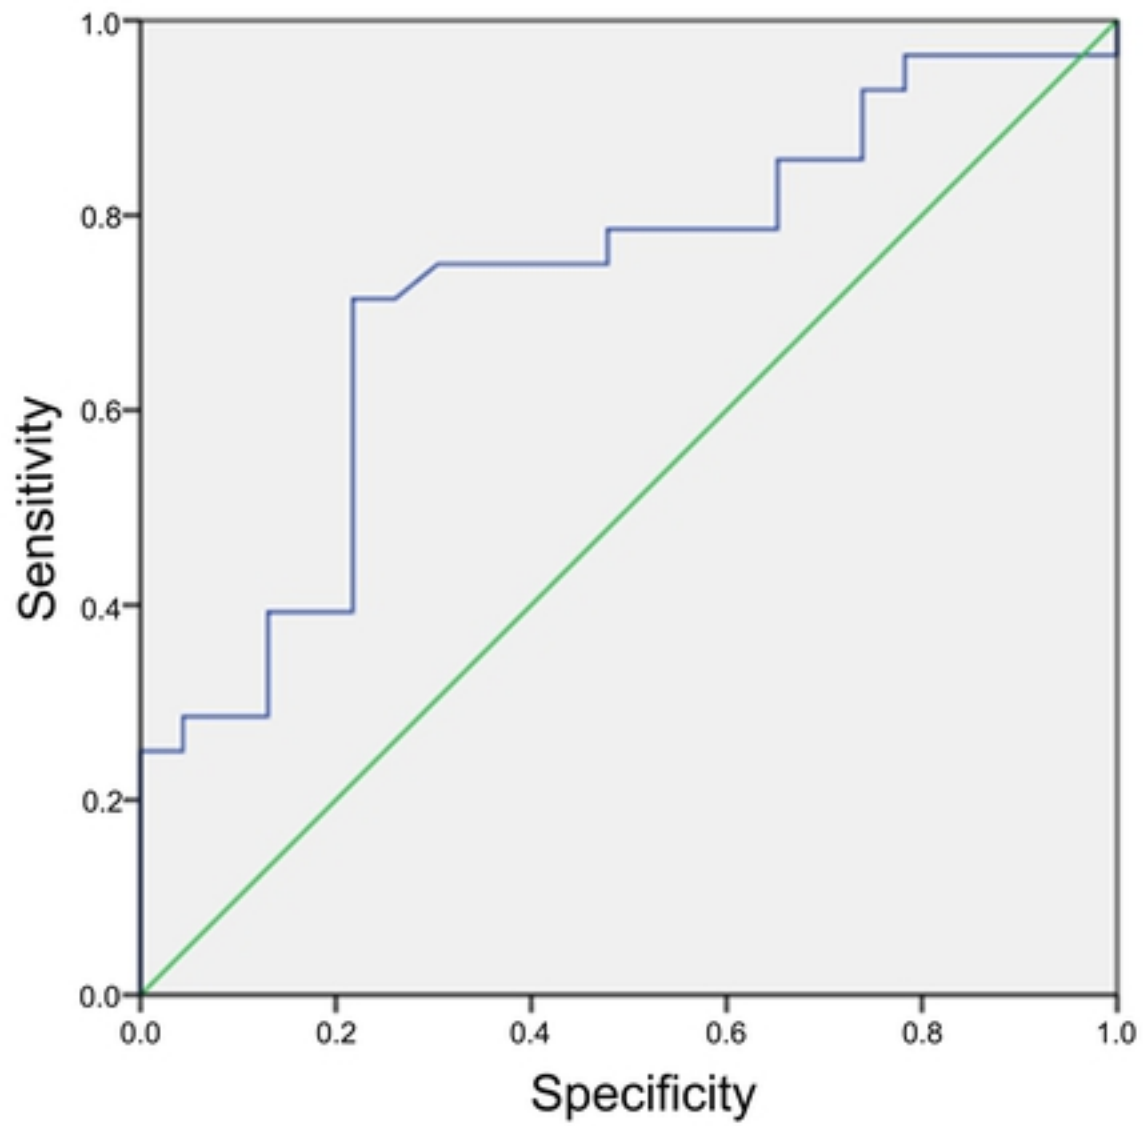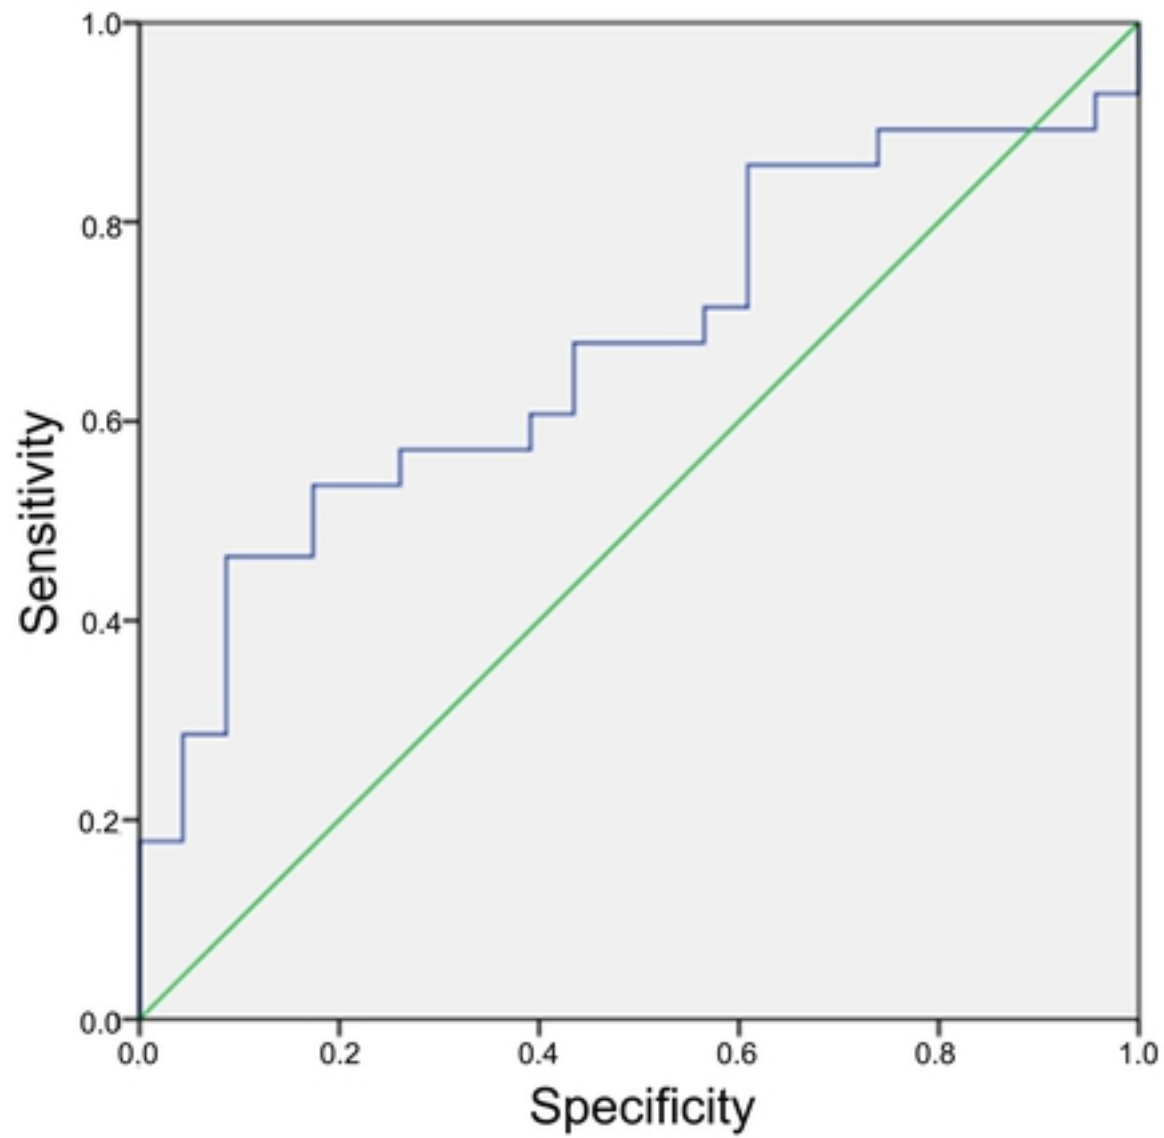

Fig 6



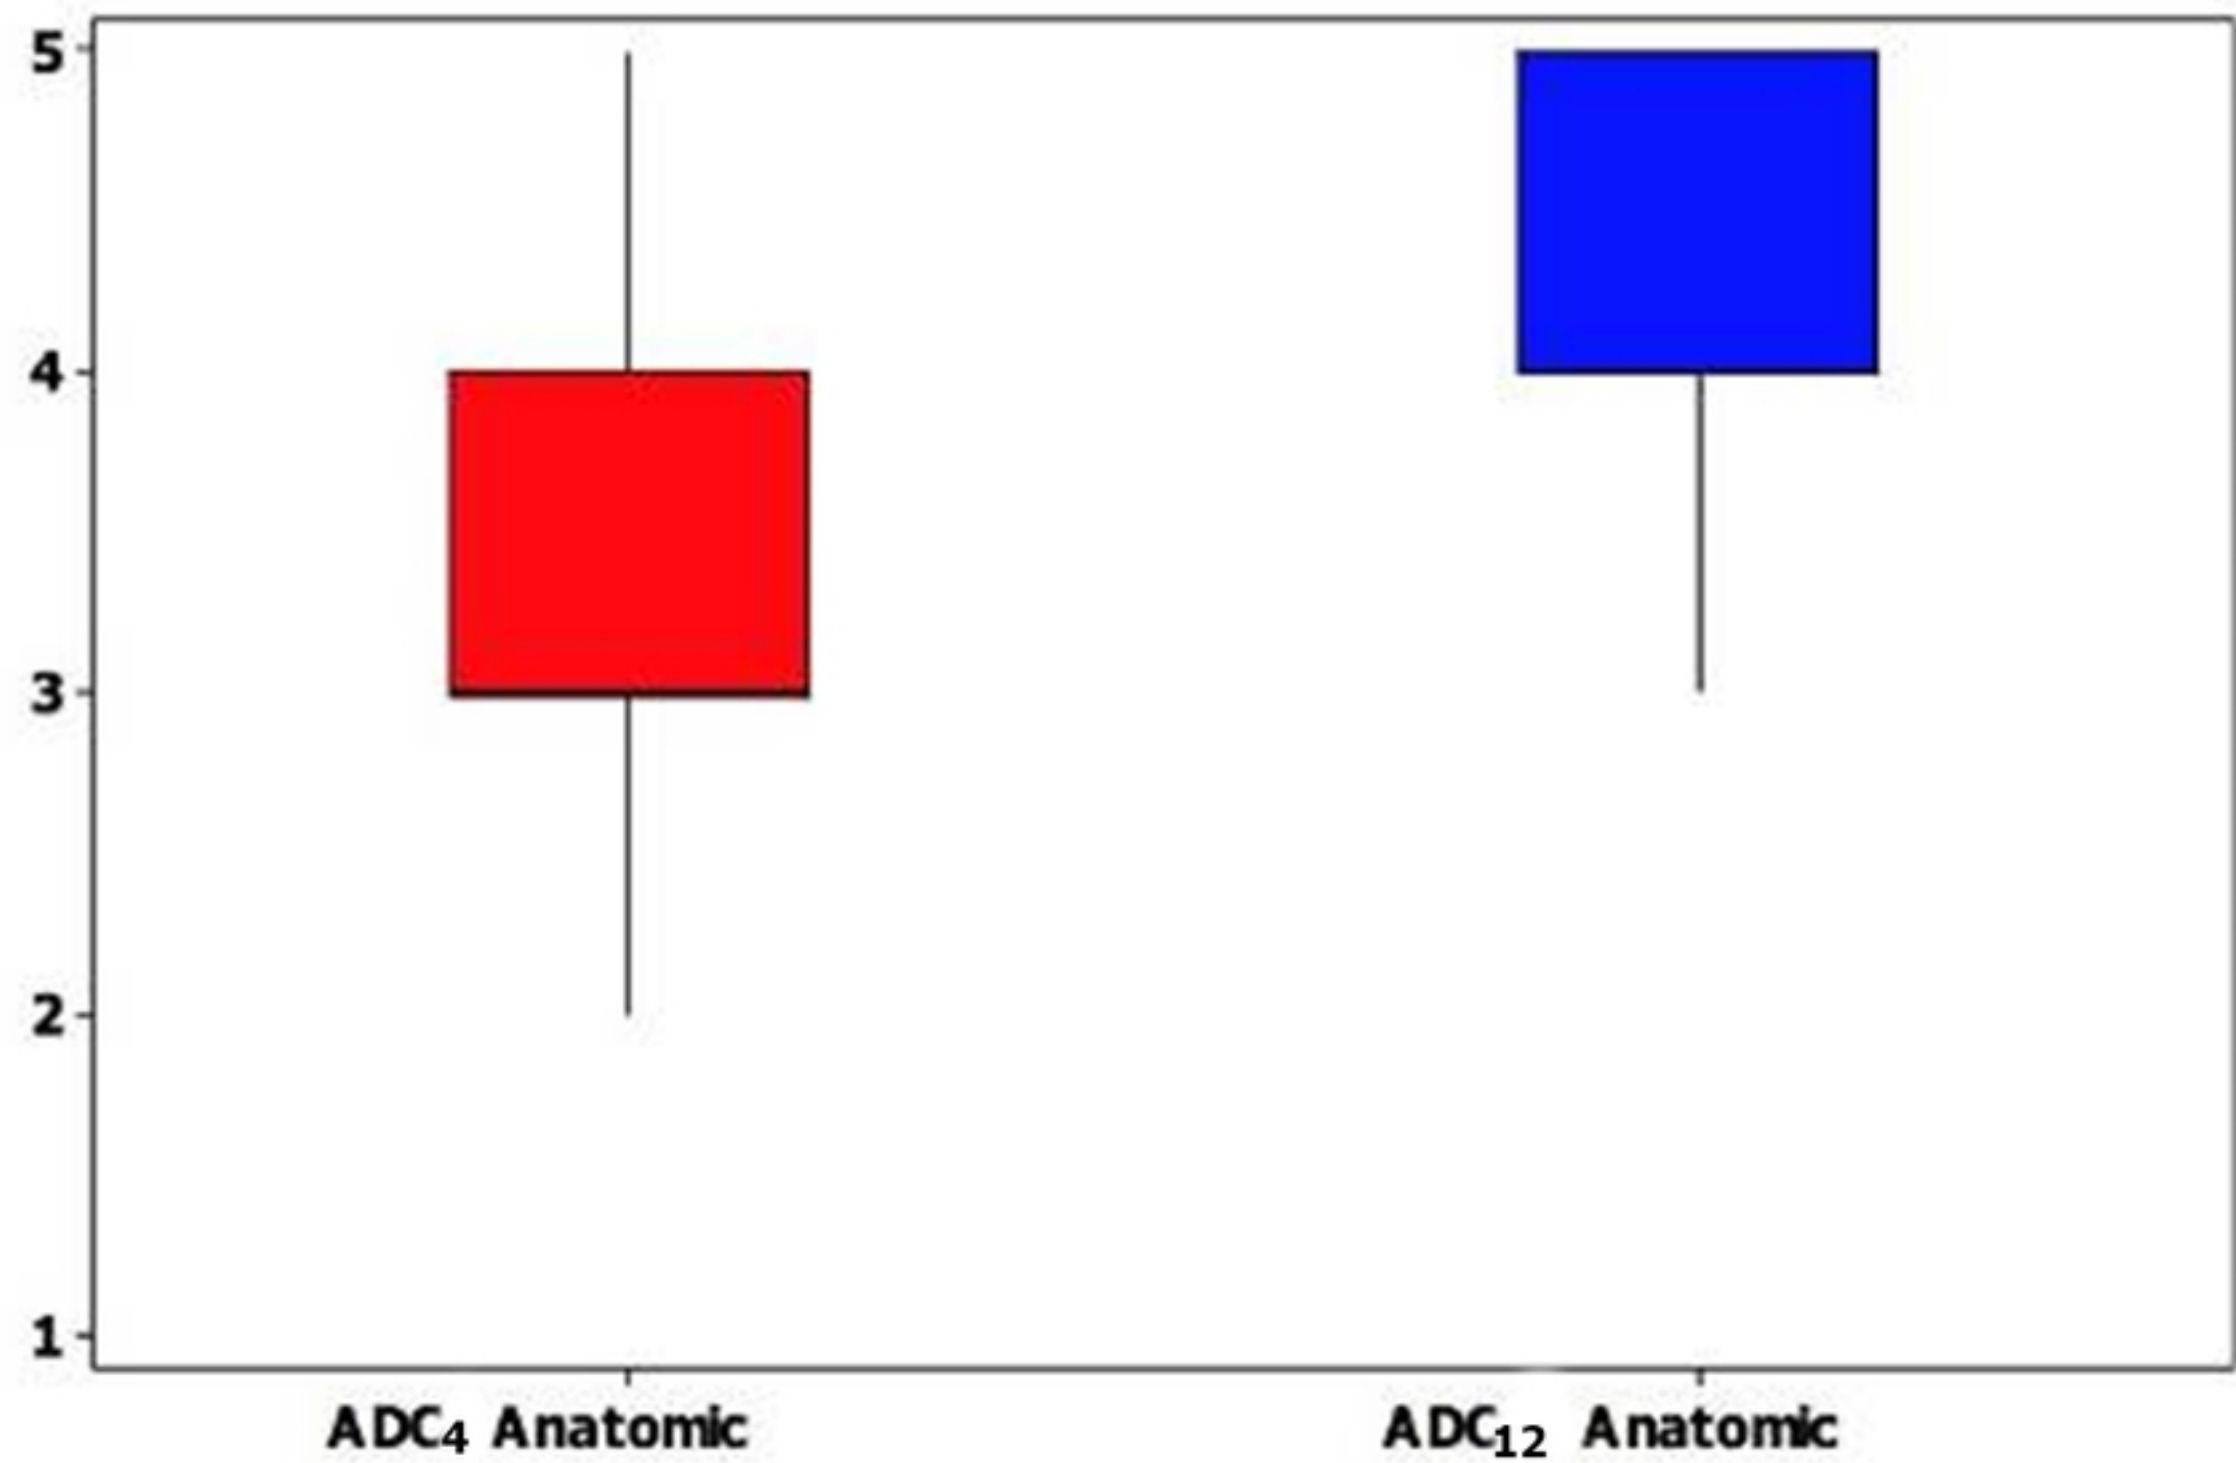

Fig 7

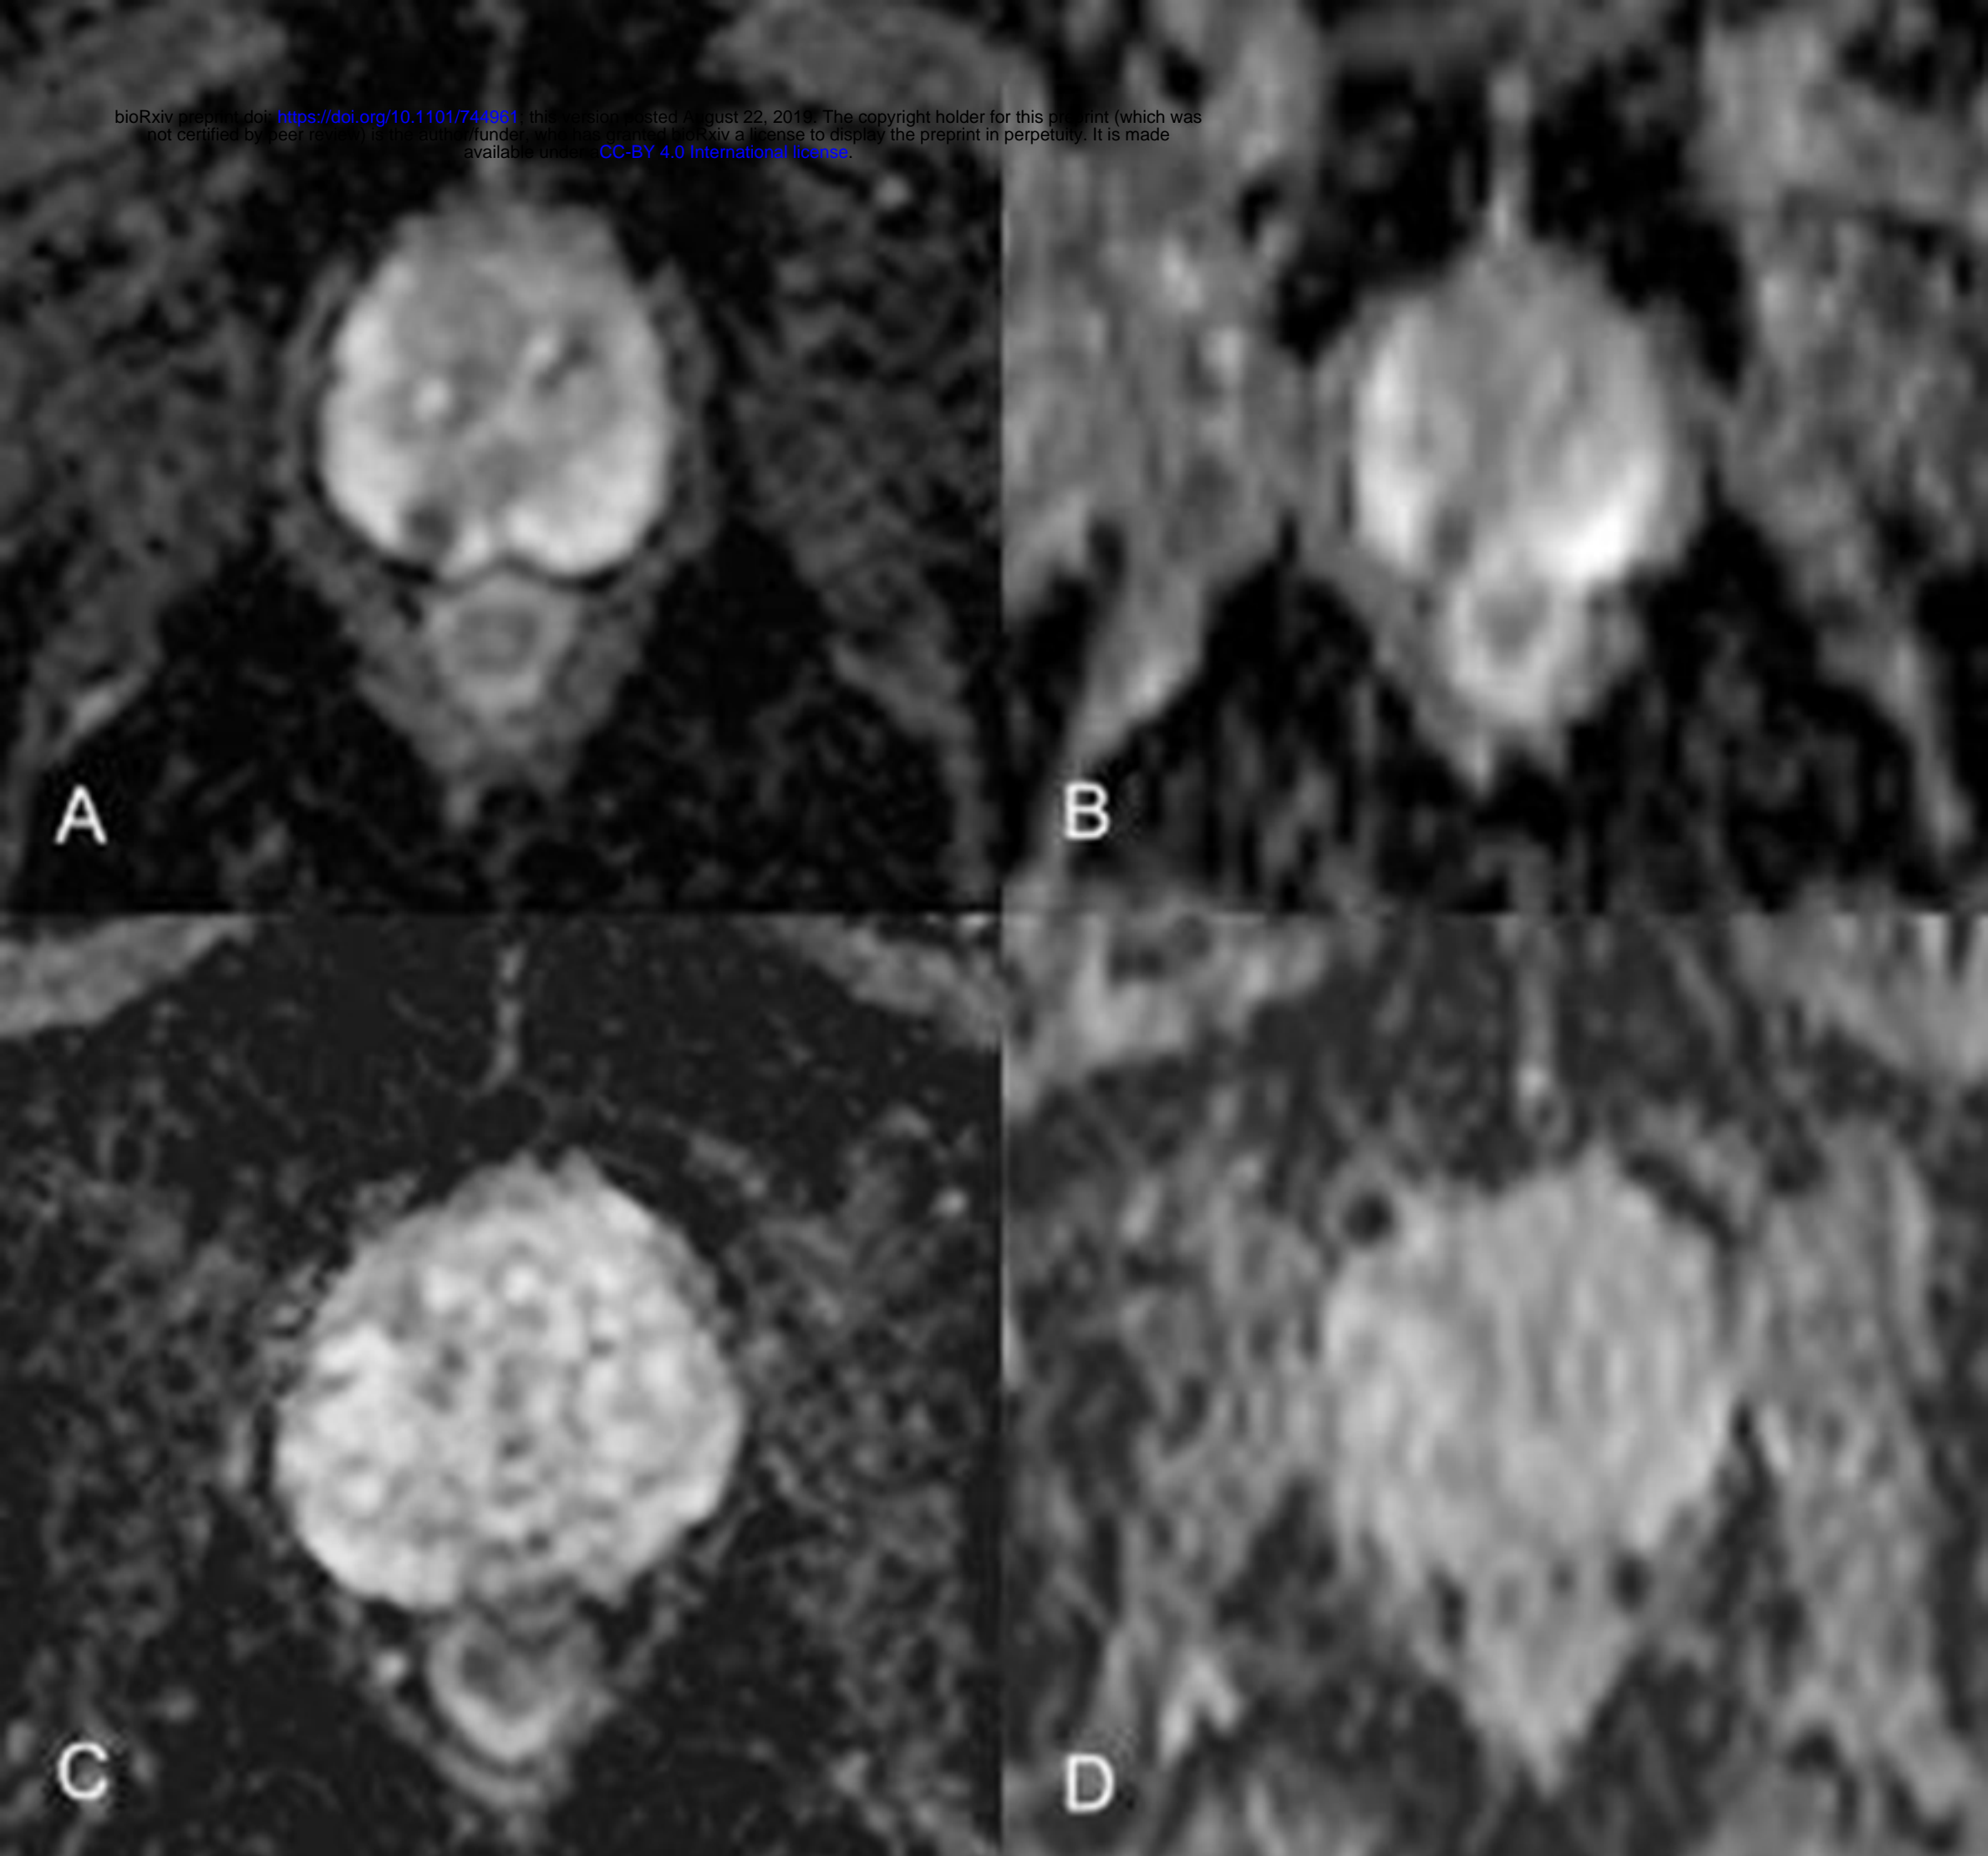

Fig 8
